# Supplementary material for: The record of the magnetic storm on 15 May 1921 in Stará Ďala (present-day Hurbanovo) and its compliance with the global picture of this extreme event
Source: Copernicus journal article supplement (doi:10.5194/angeo-41-355-2023), 2023-09-12

13 May 1921  
00:00 UT – 01:00 UT

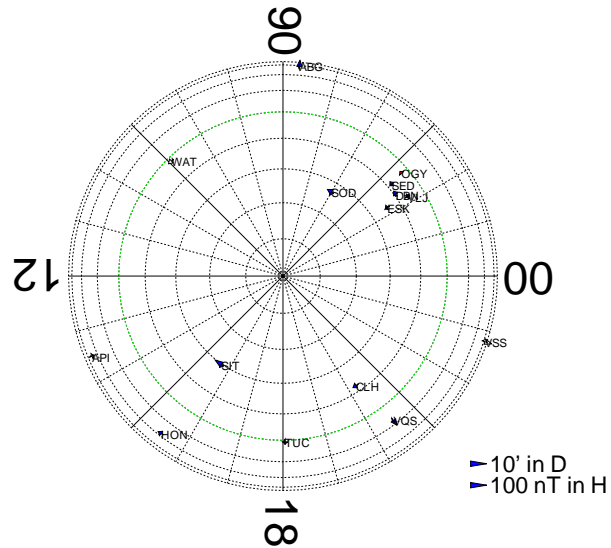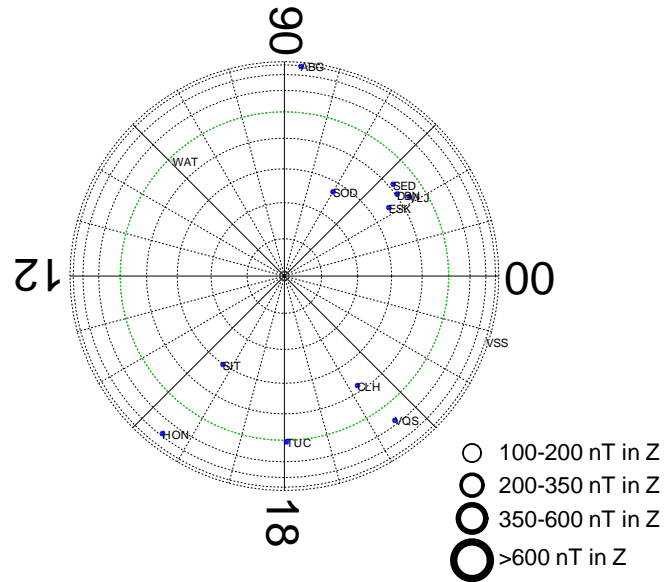

13 May 1921  
01:00 UT – 02:00 UT

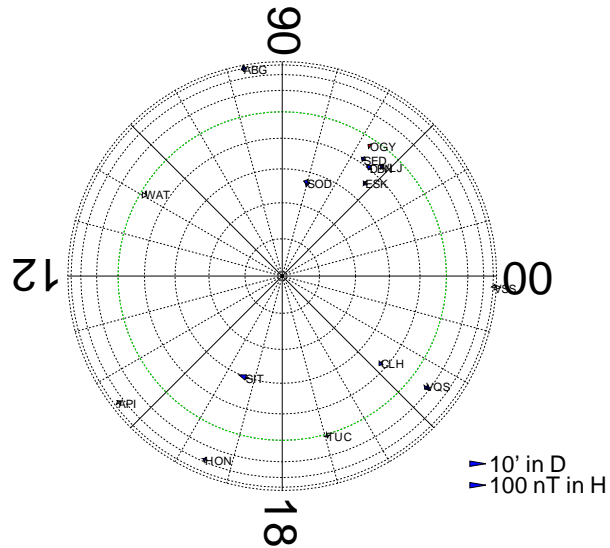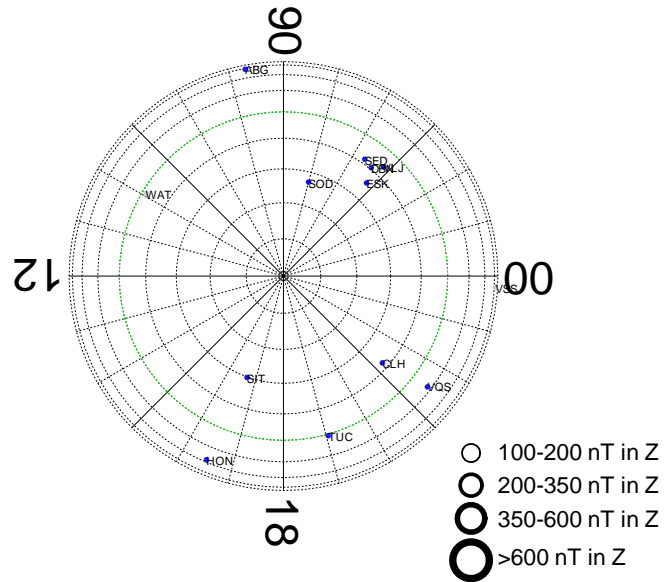

13 May 1921  
02:00 UT – 03:00 UT

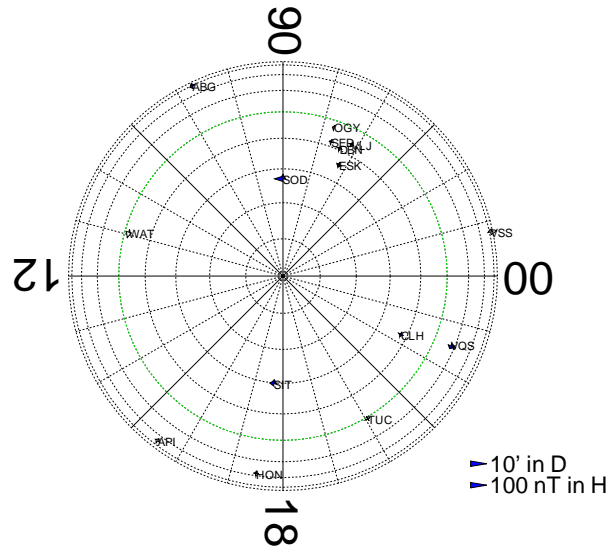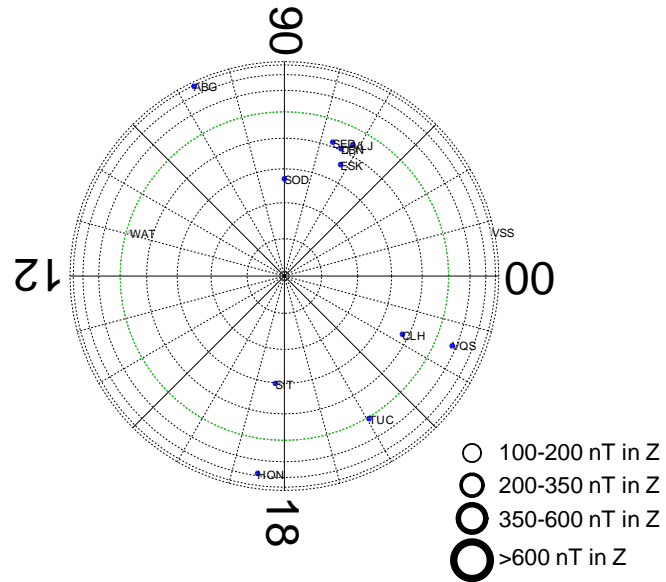

13 May 1921  
03:00 UT – 04:00 UT

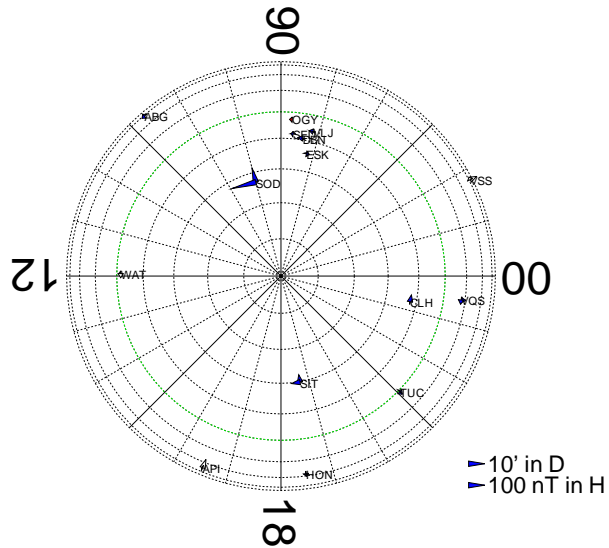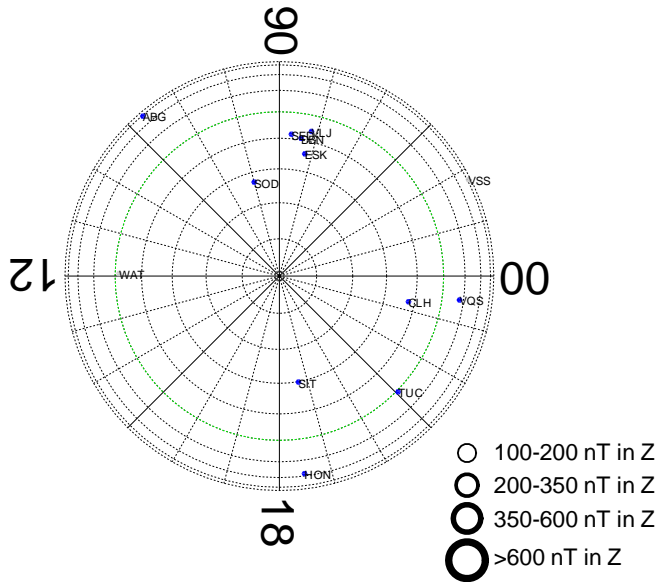

- 100-200 nT in Z
- 200-350 nT in Z
- 350-600 nT in Z
- >600 nT in Z

13 May 1921  
04:00 UT – 05:00 UT

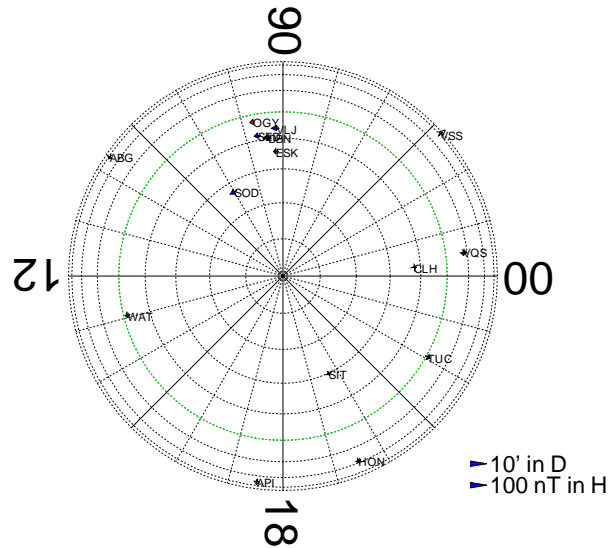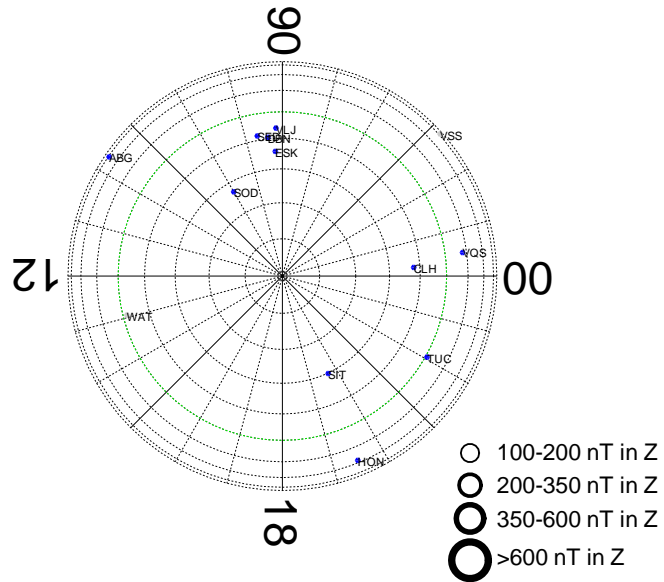

13 May 1921  
05:00 UT – 06:00 UT

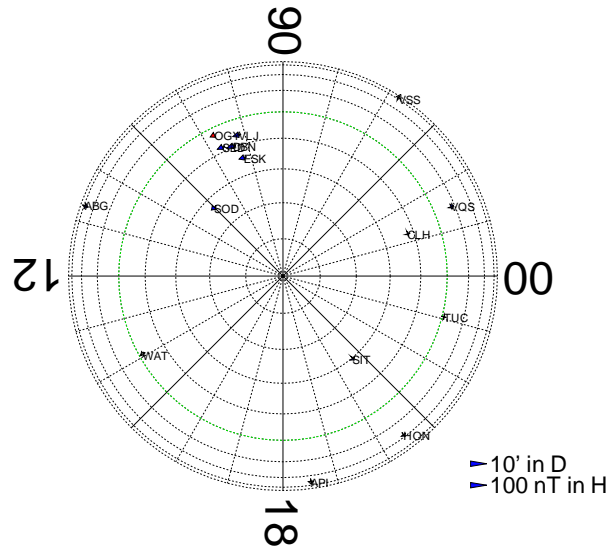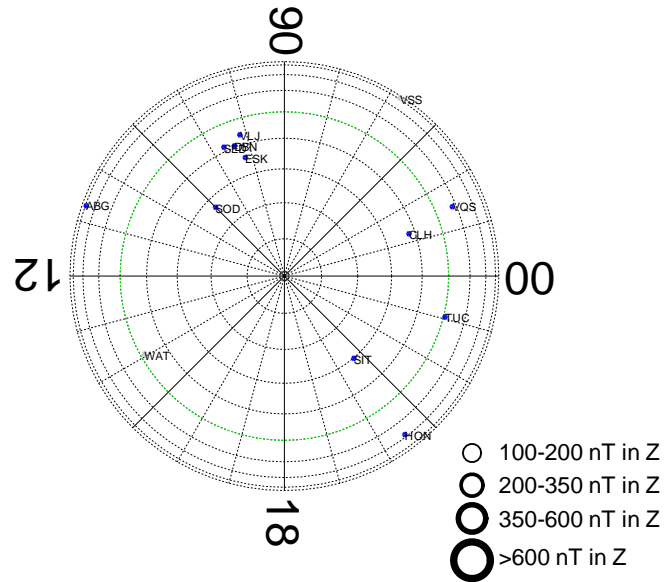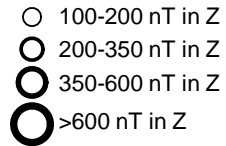

13 May 1921  
06:00 UT – 07:00 UT

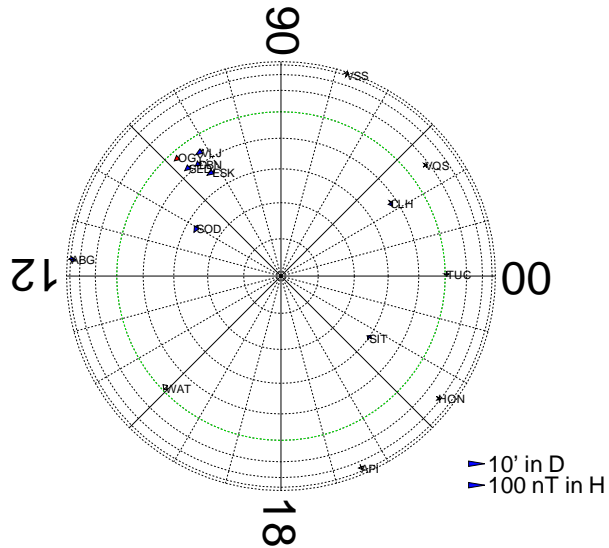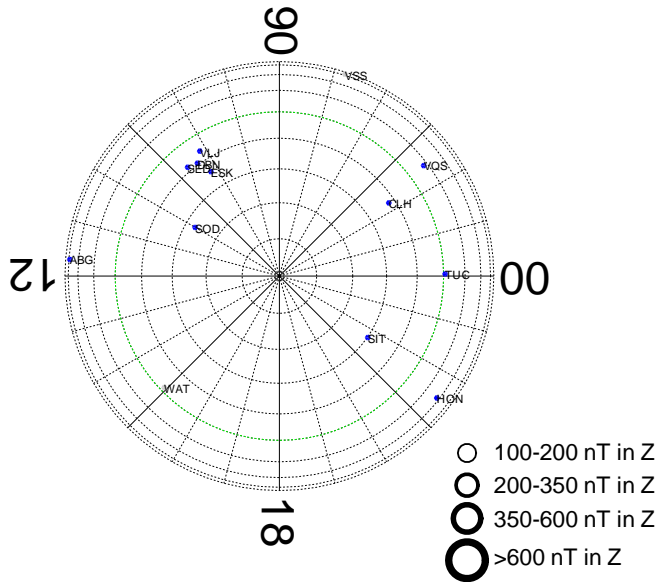

13 May 1921  
07:00 UT – 08:00 UT

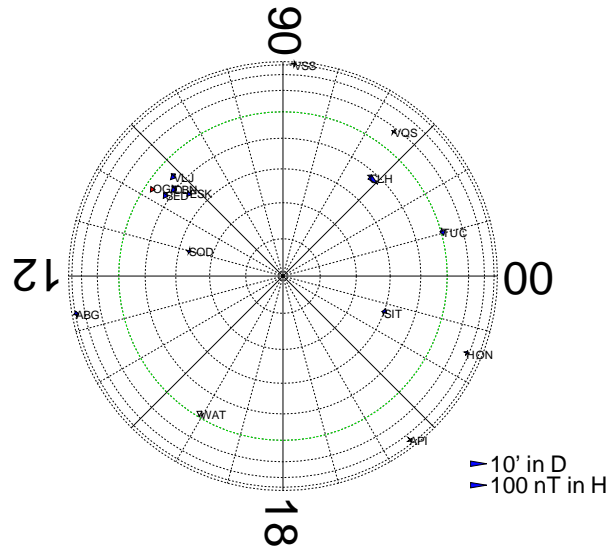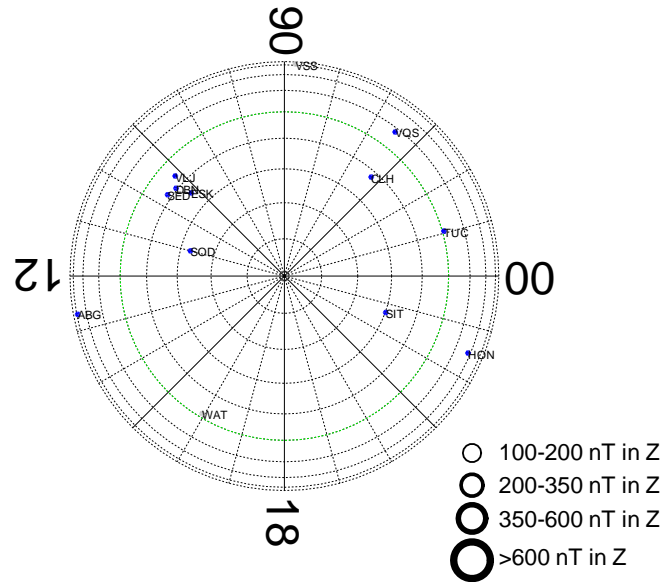



13 May 1921  
08:00 UT – 09:00 UT

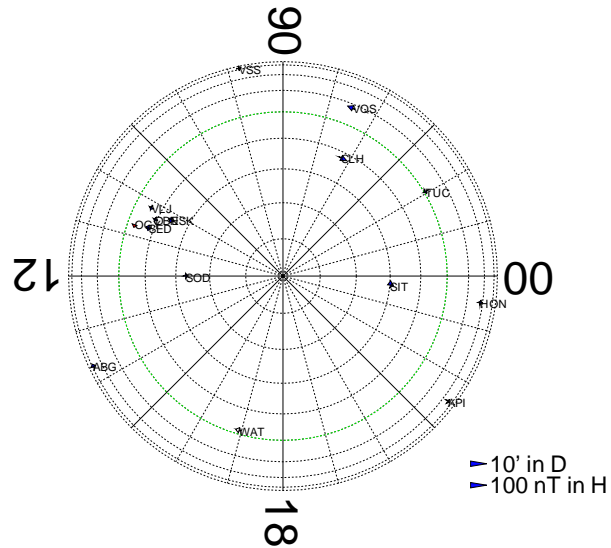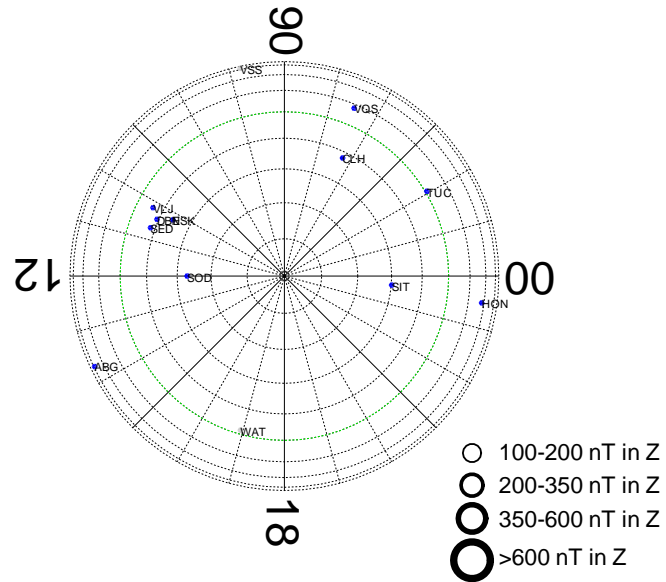

13 May 1921  
09:00 UT – 10:00 UT

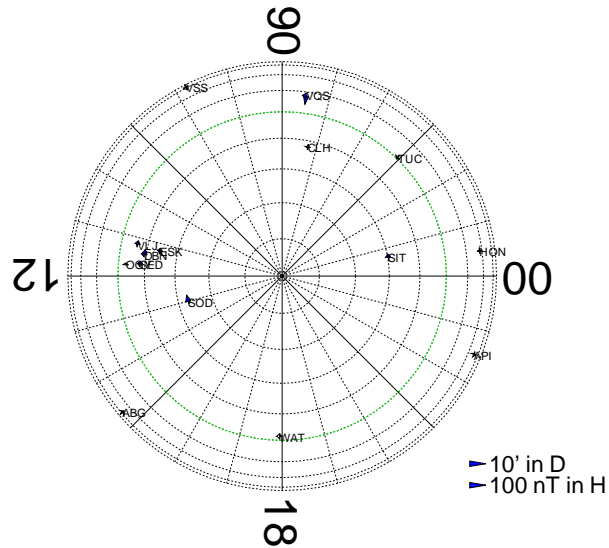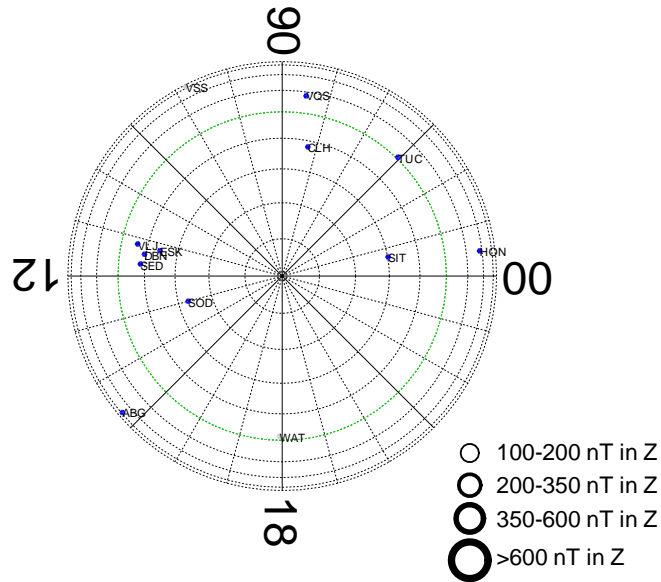

13 May 1921  
10:00 UT – 11:00 UT

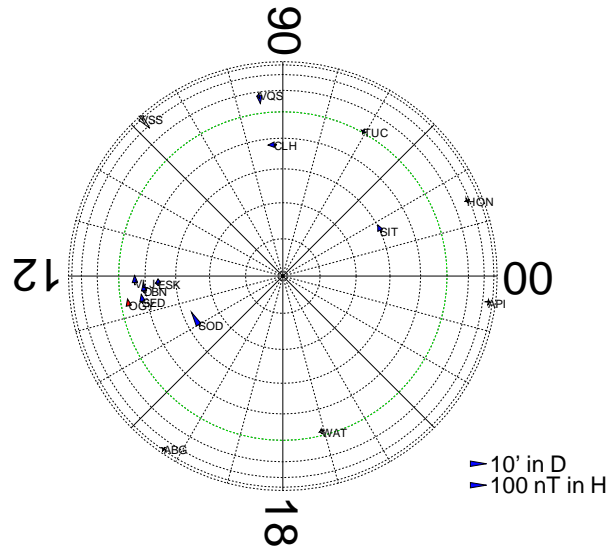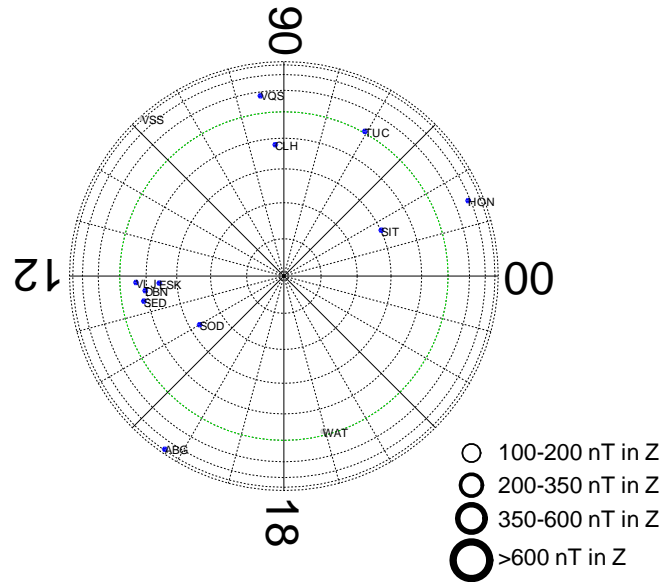

13 May 1921  
11:00 UT – 12:00 UT

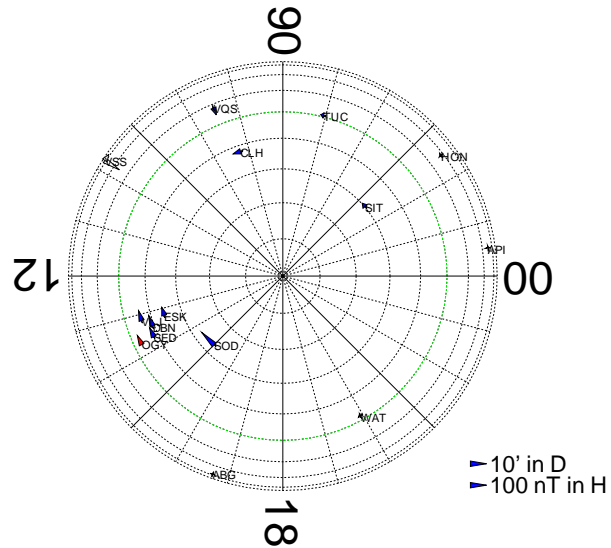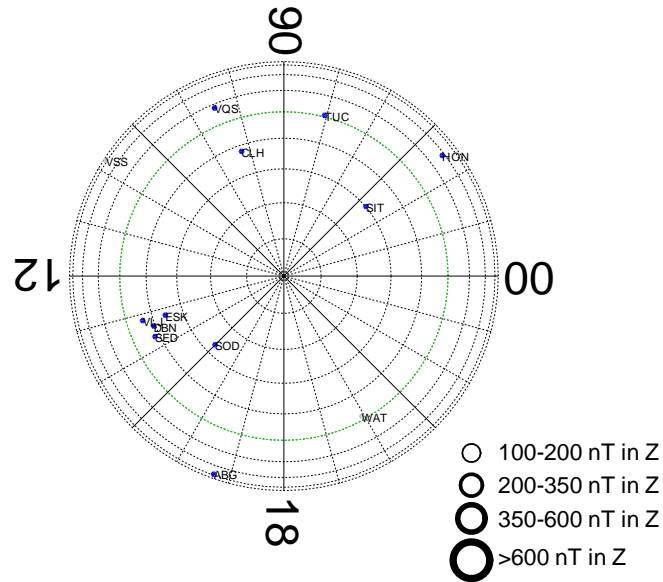

13 May 1921  
12:00 UT – 13:00 UT

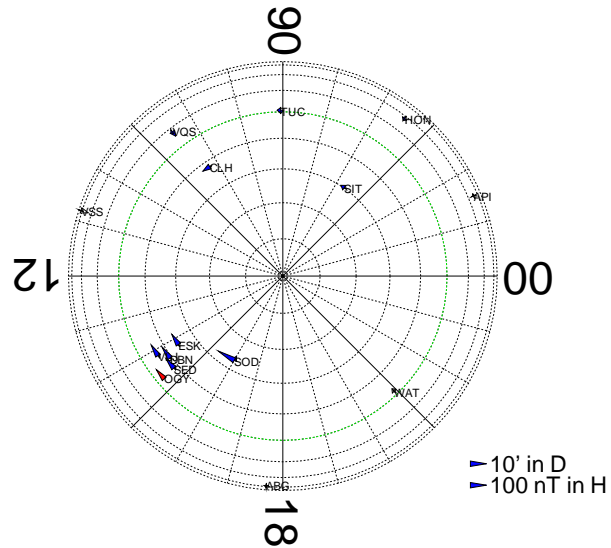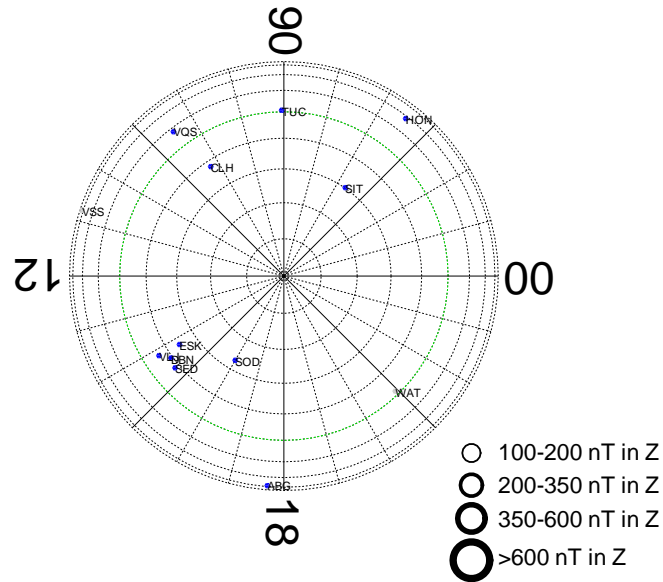

13 May 1921  
13:00 UT – 14:00 UT

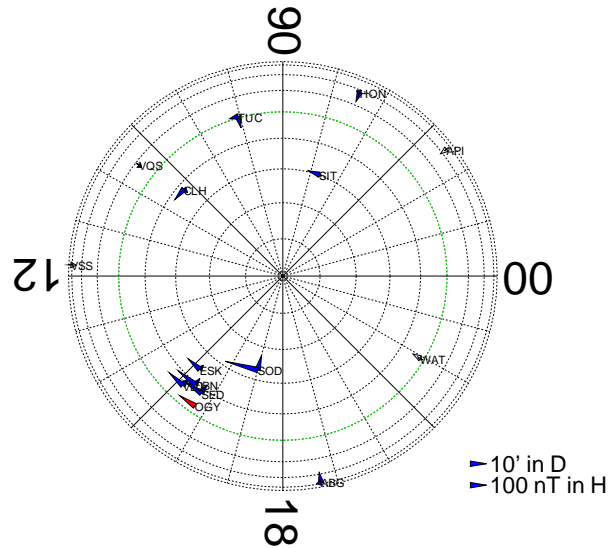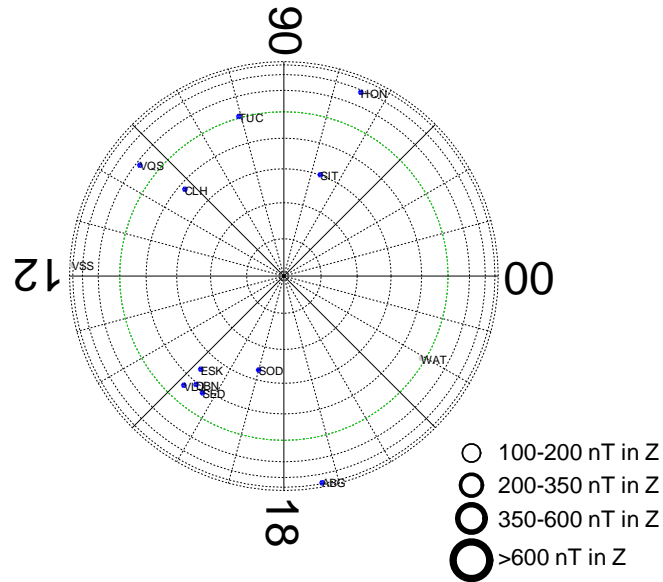

13 May 1921  
14:00 UT – 15:00 UT

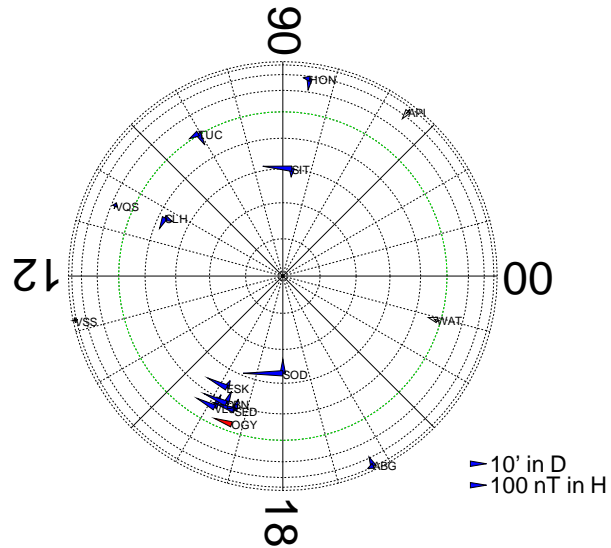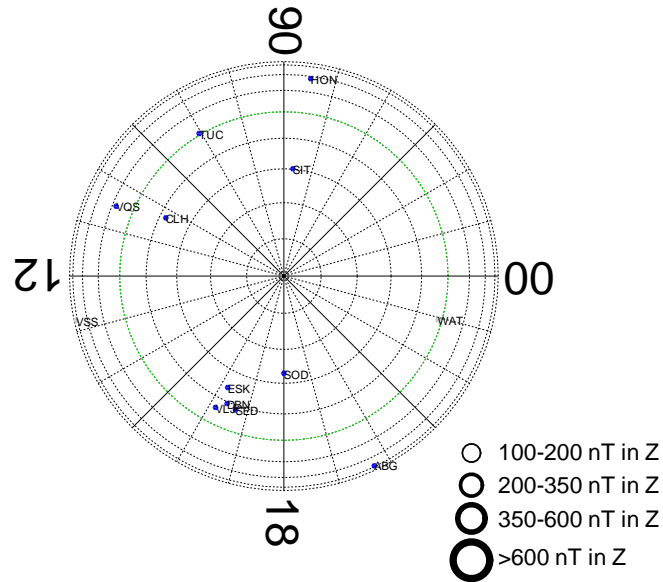

13 May 1921  
15:00 UT – 16:00 UT

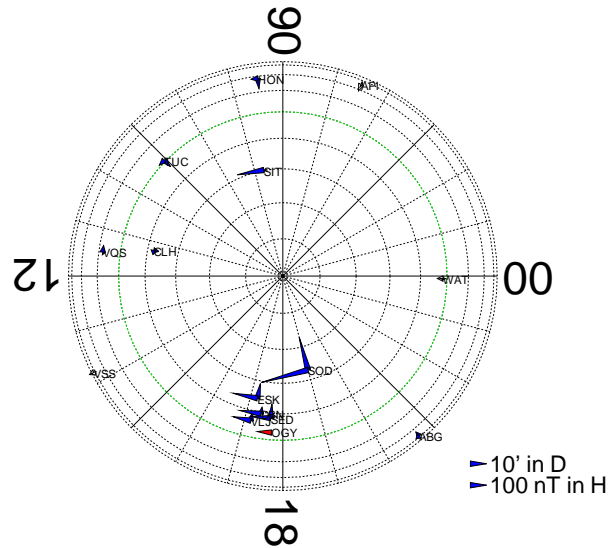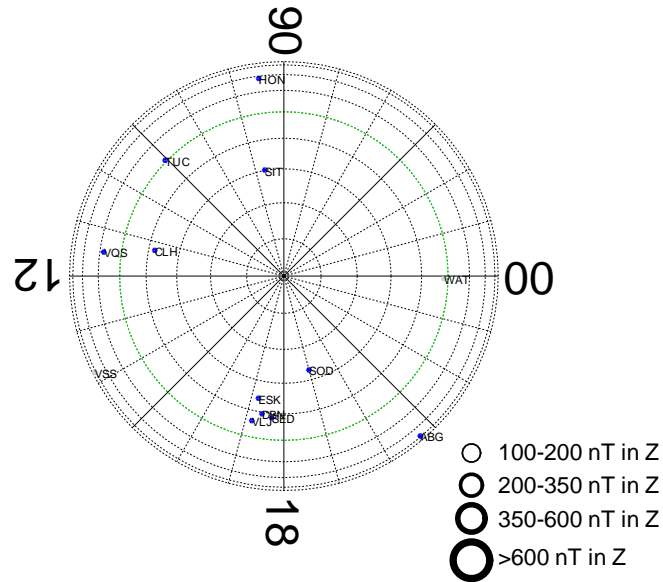



13 May 1921  
16:00 UT – 17:00 UT

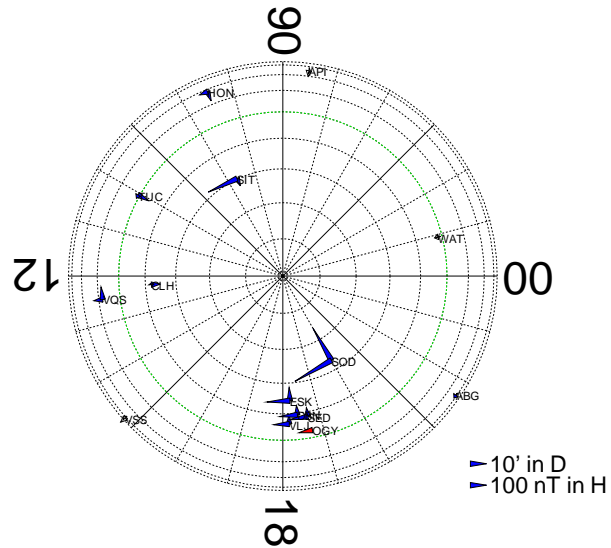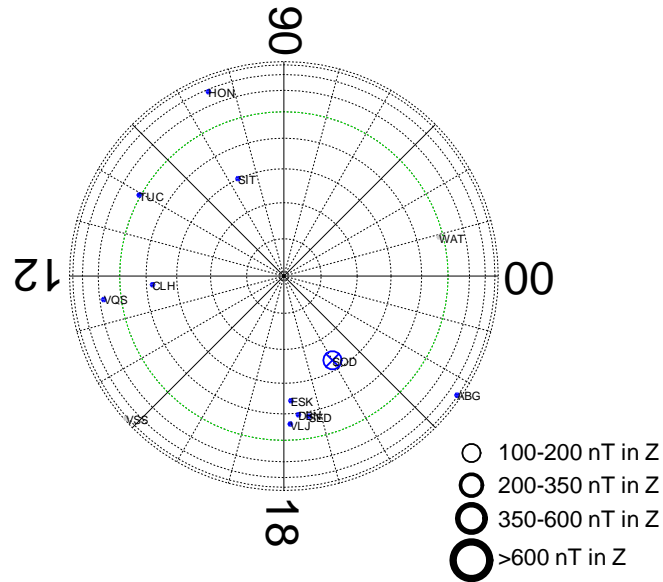

13 May 1921  
17:00 UT – 18:00 UT

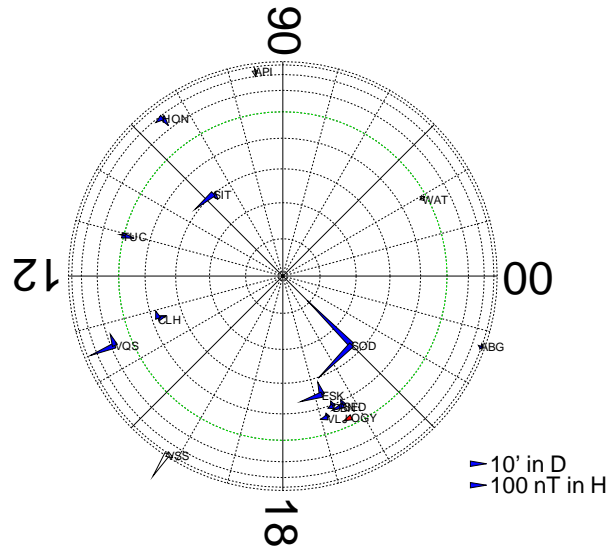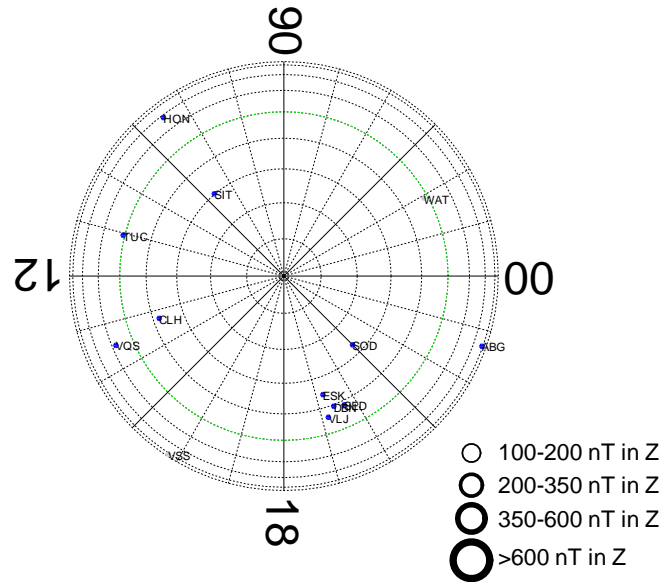

13 May 1921  
18:00 UT – 19:00 U

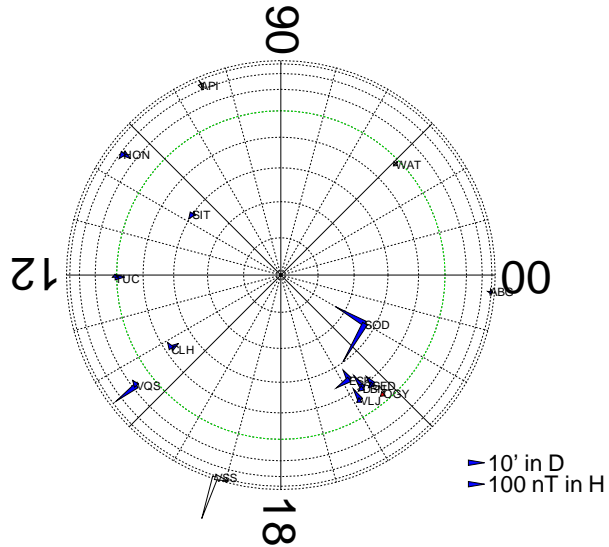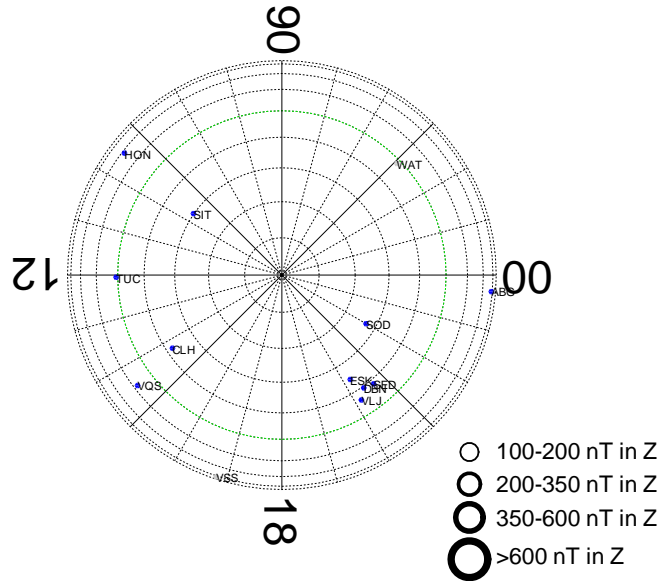

13 May 1921  
19:00 UT – 20:00 UT

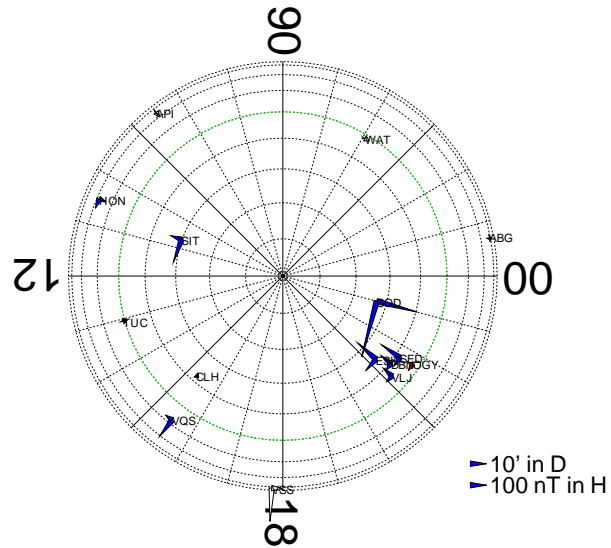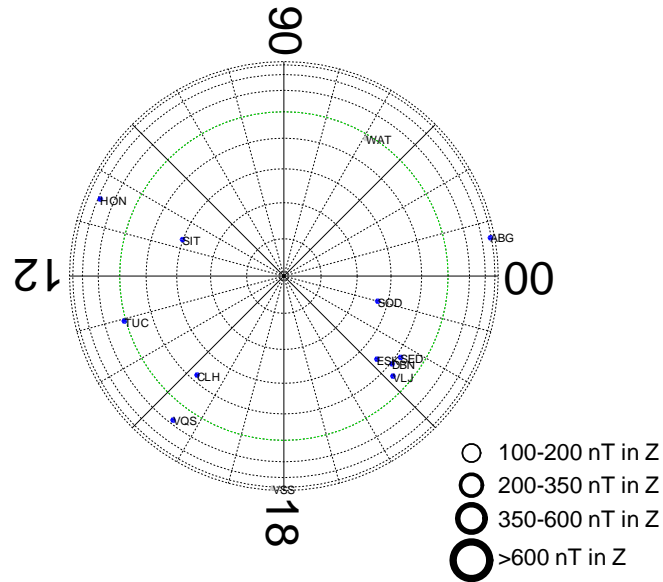

13 May 1921  
20:00 UT – 21:00 UT

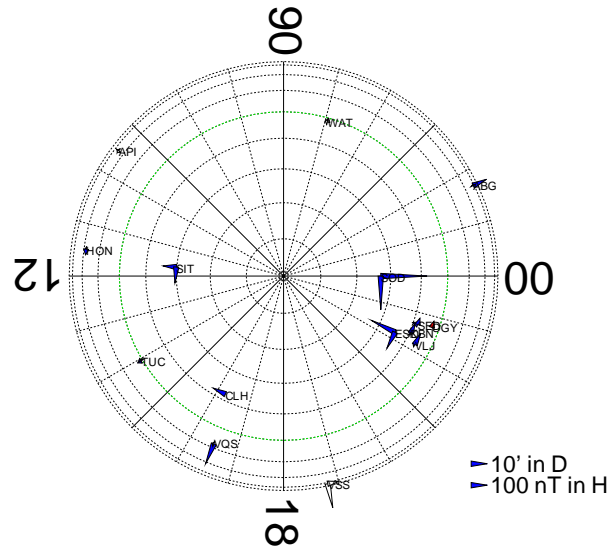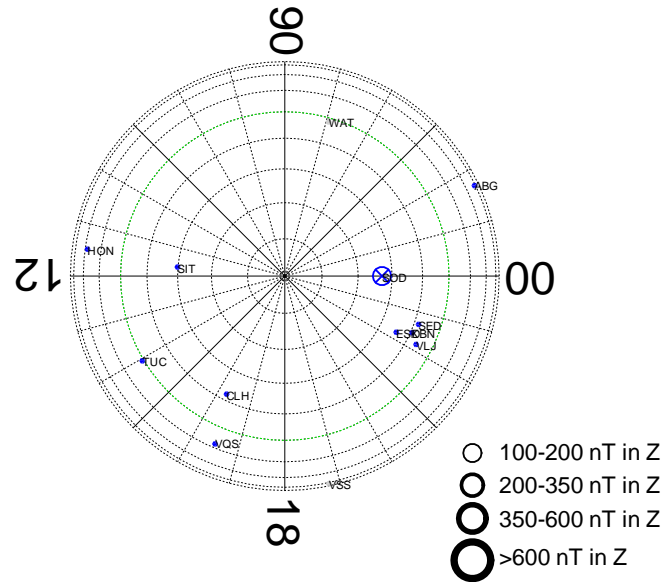

13 May 1921  
21:00 UT – 22:00 UT

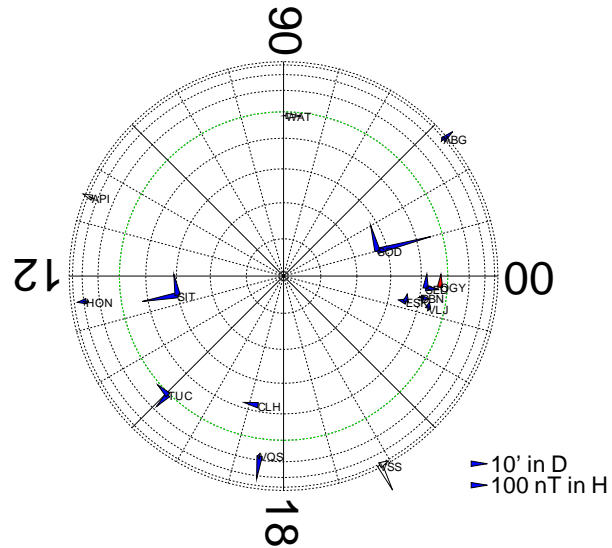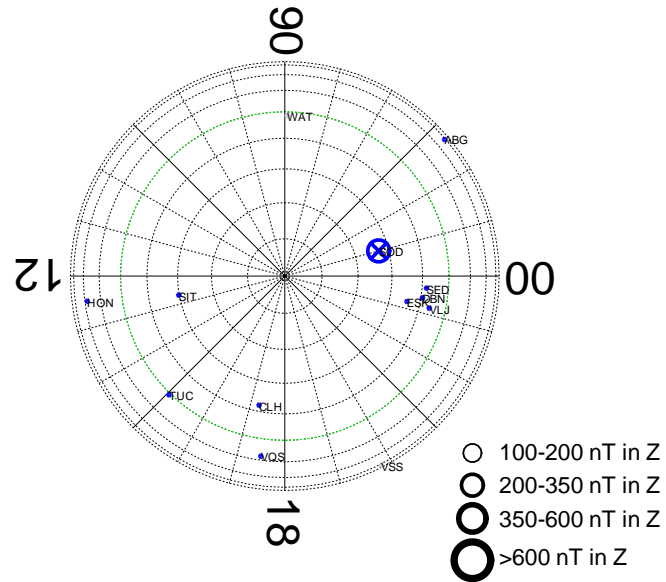

13 May 1921  
22:00 UT – 23:00 UT

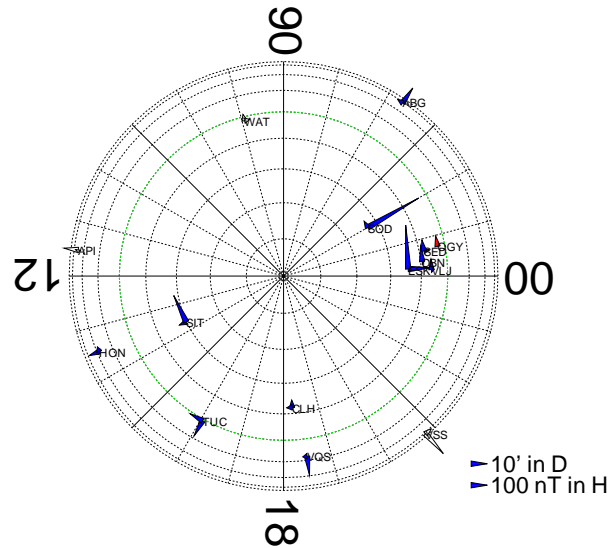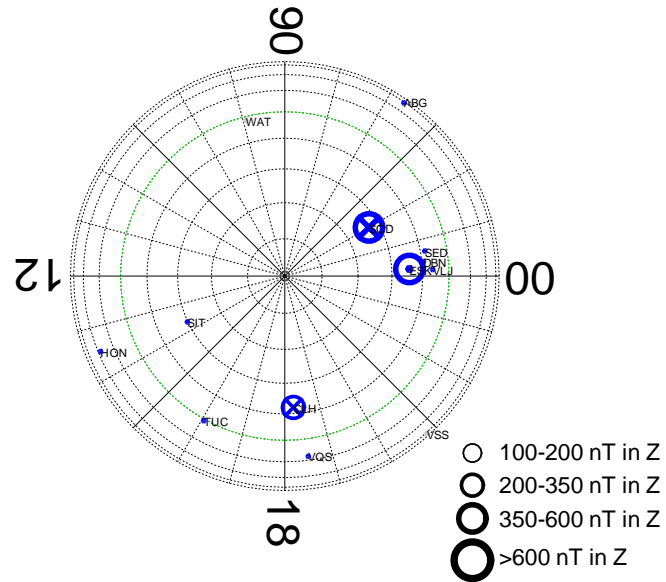

13 May 1921  
23:00 UT – Midnight

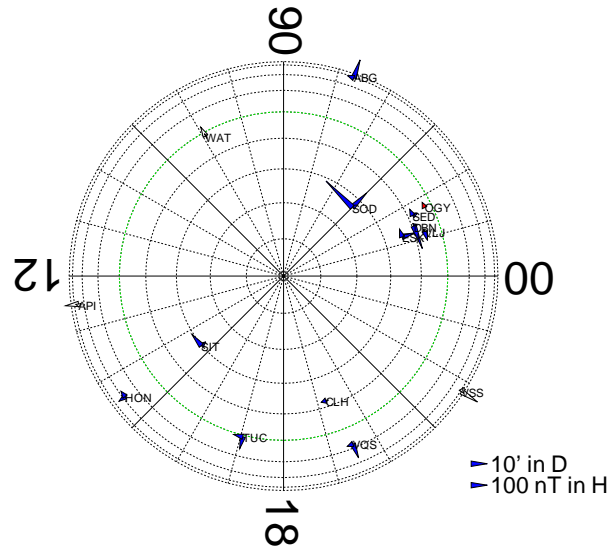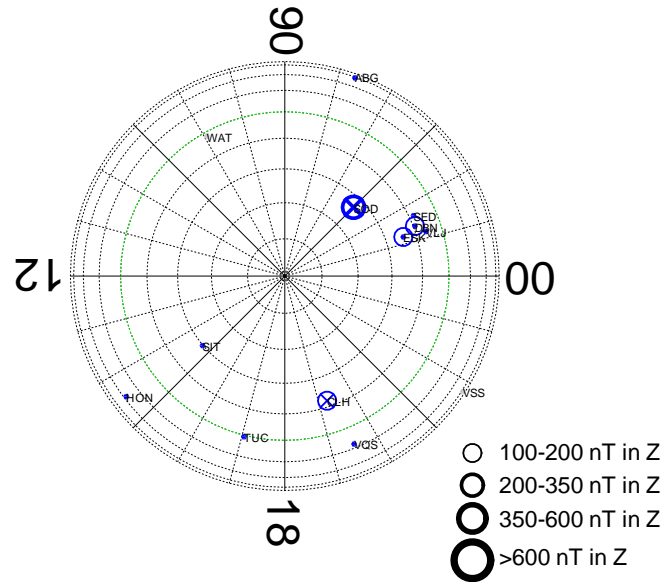



14 May 1921  
00:00 UT – 01:00 UT

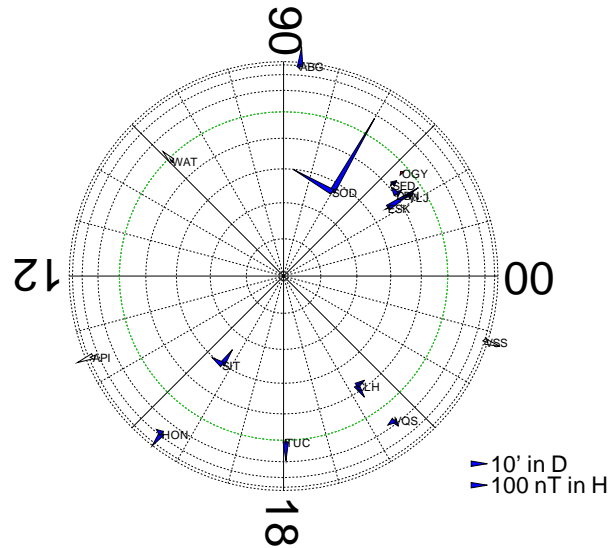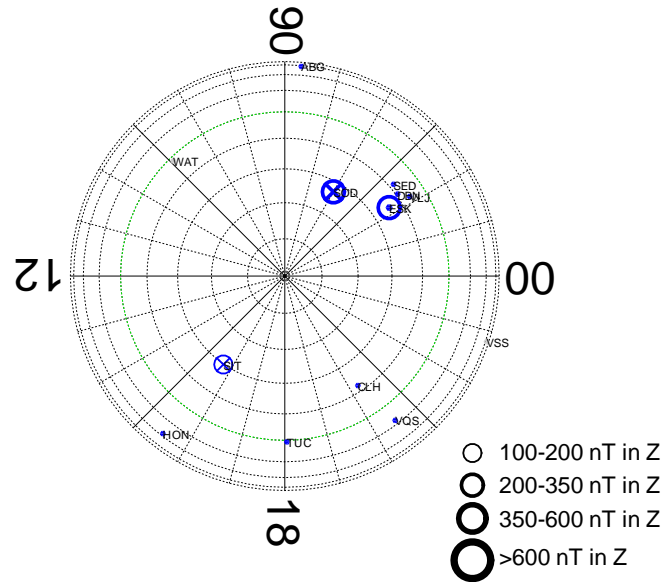

14 May 1921  
01:00 UT – 02:00 UT

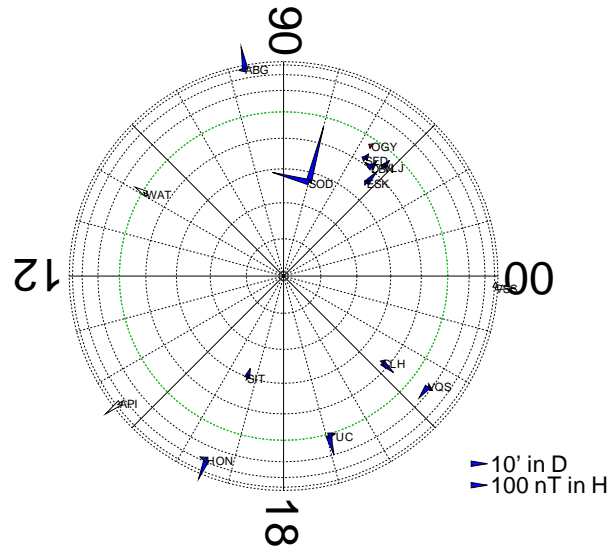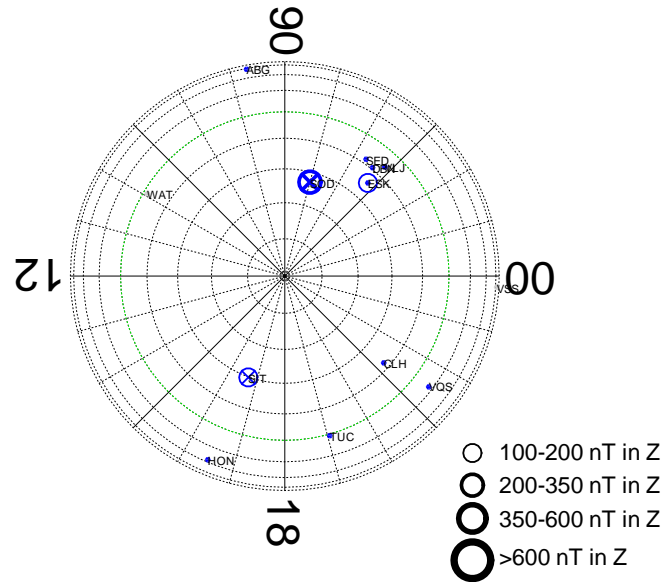

14 May 1921  
02:00 UT – 03:00 UT

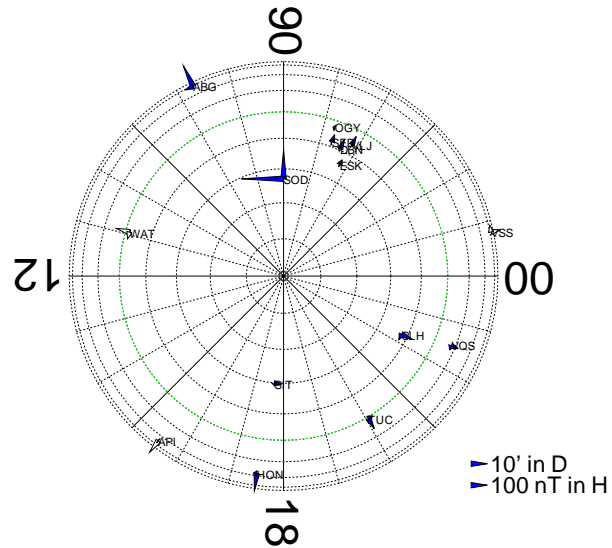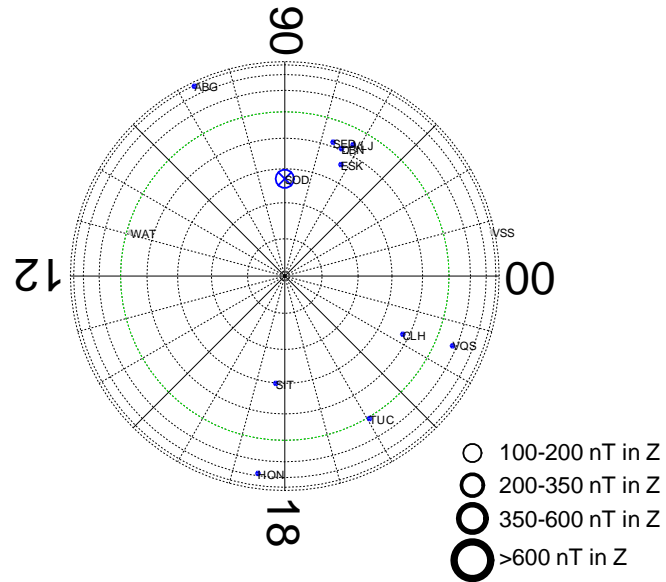

14 May 1921  
03:00 UT – 04:00 UT

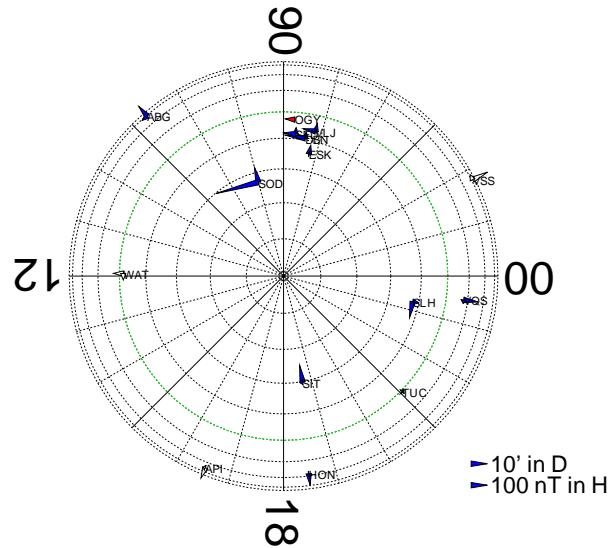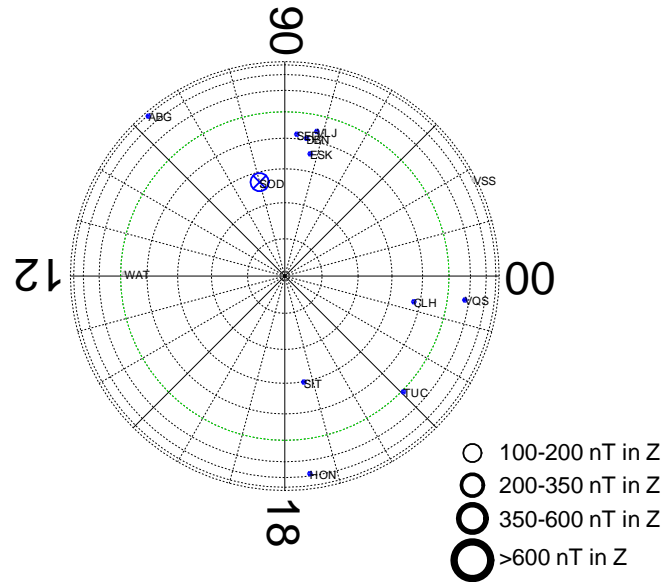

14 May 1921  
04:00 UT – 05:00 UT

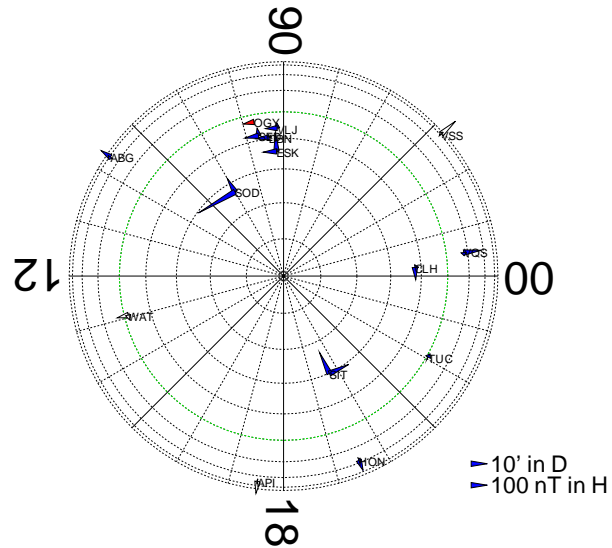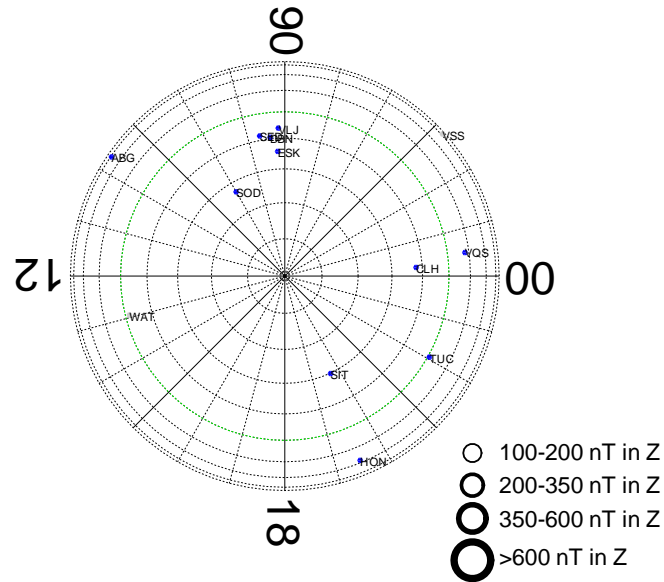

14 May 1921  
05:00 UT – 06:00 UT

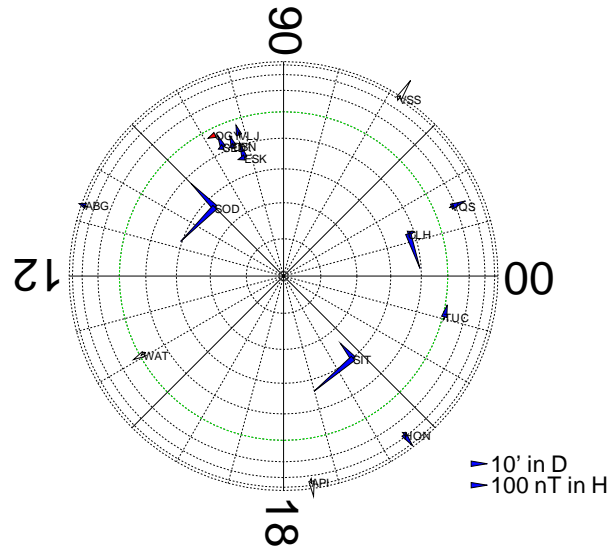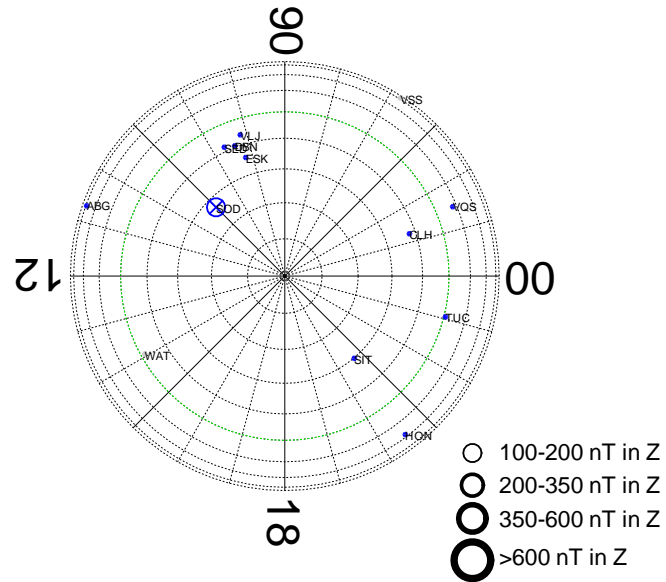

14 May 1921  
06:00 UT – 07:00 UT

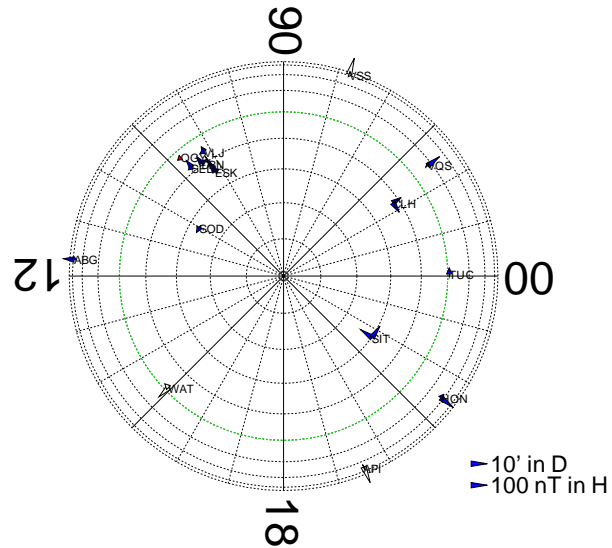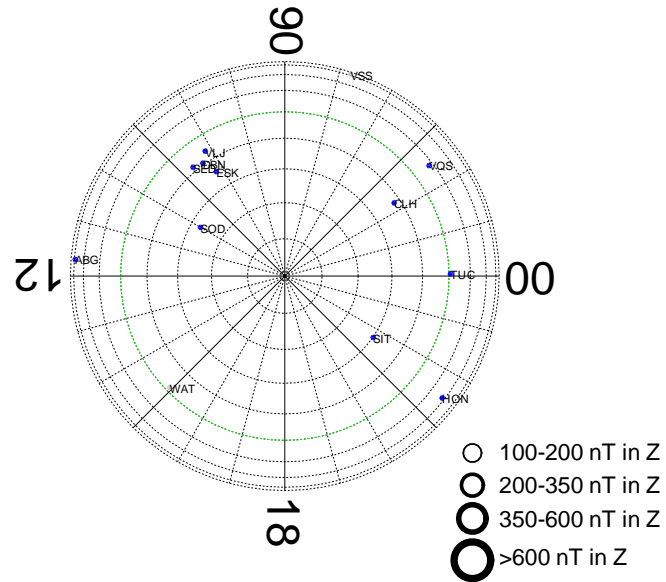

14 May 1921  
07:00 UT – 08:00 UT

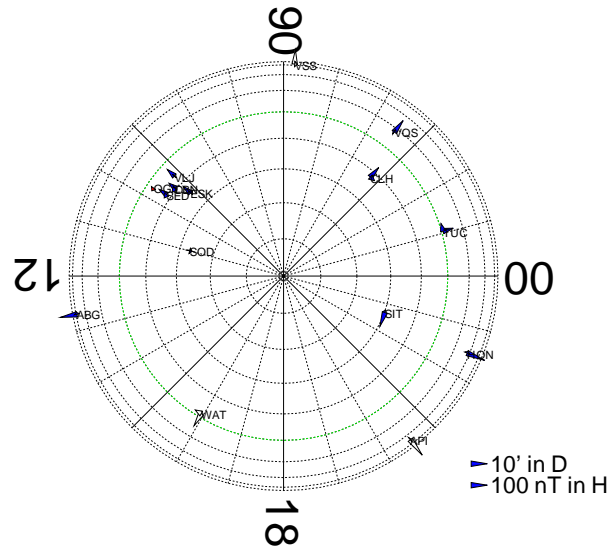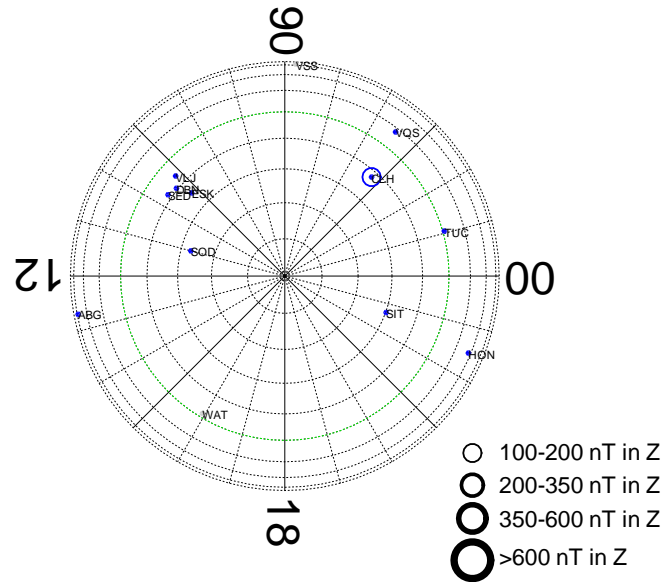



14 May 1921  
08:00 UT – 09:00 UT

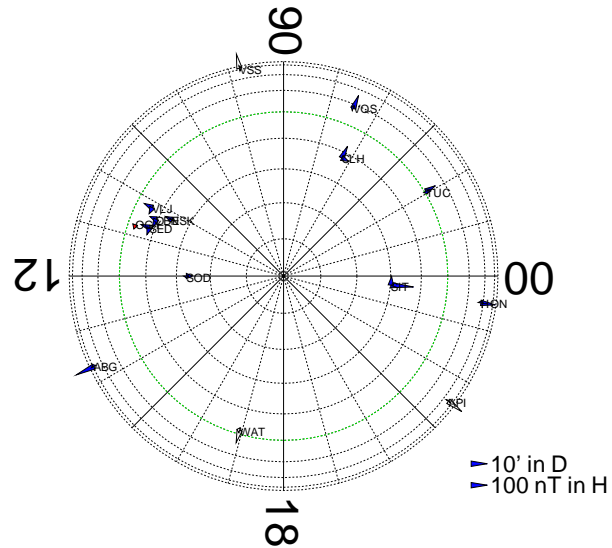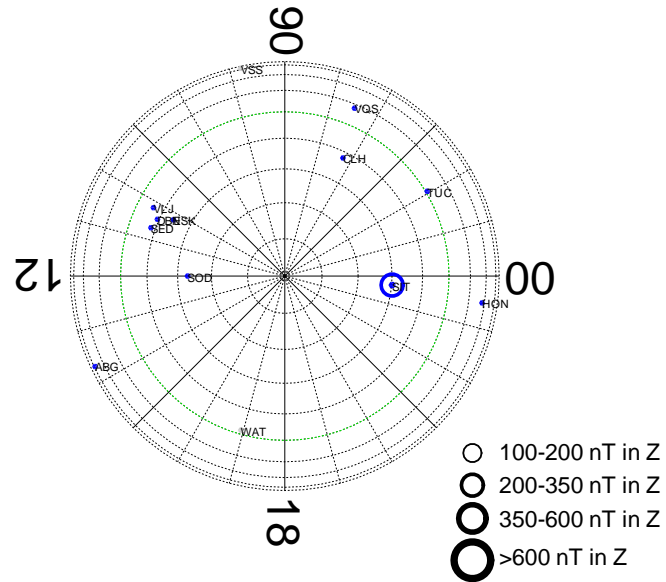

14 May 1921  
09:00 UT – 10:00 UT

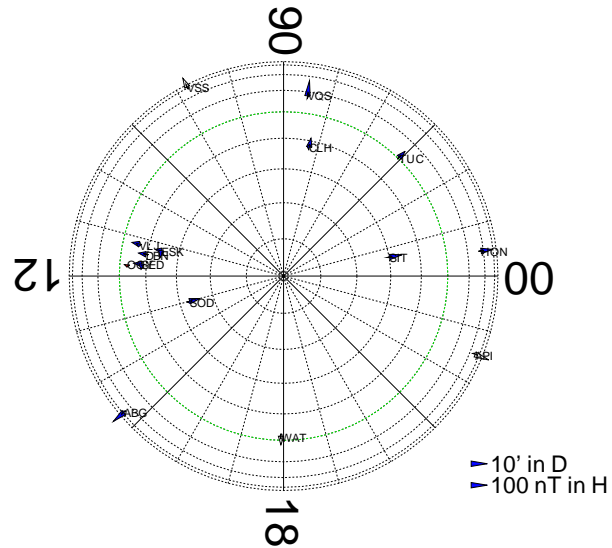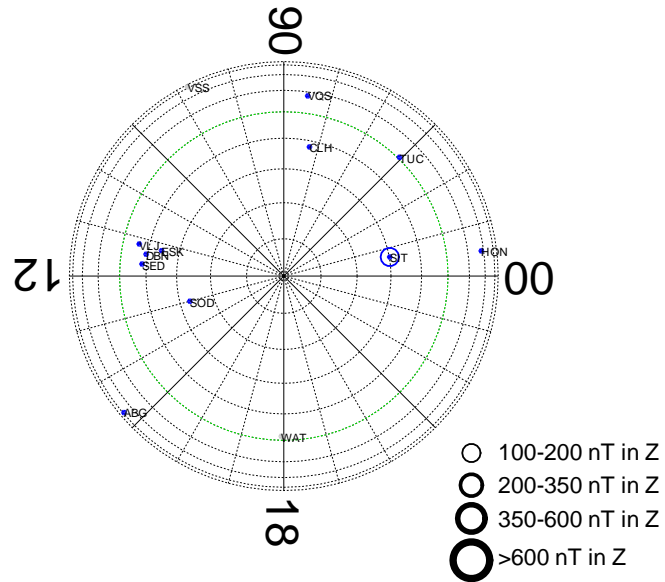

14 May 1921  
10:00 UT – 11:00 UT

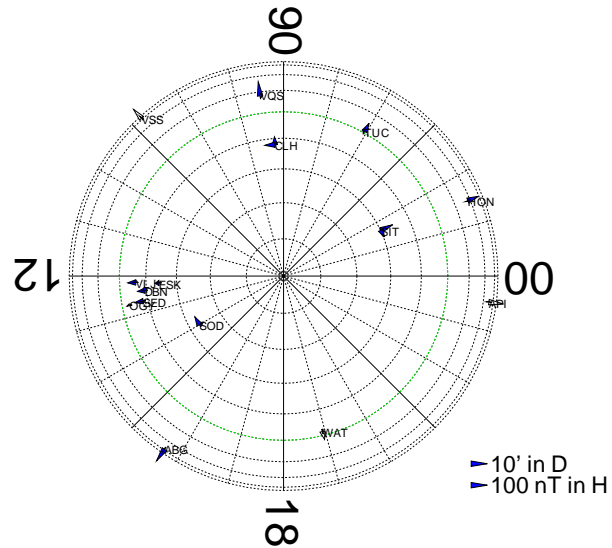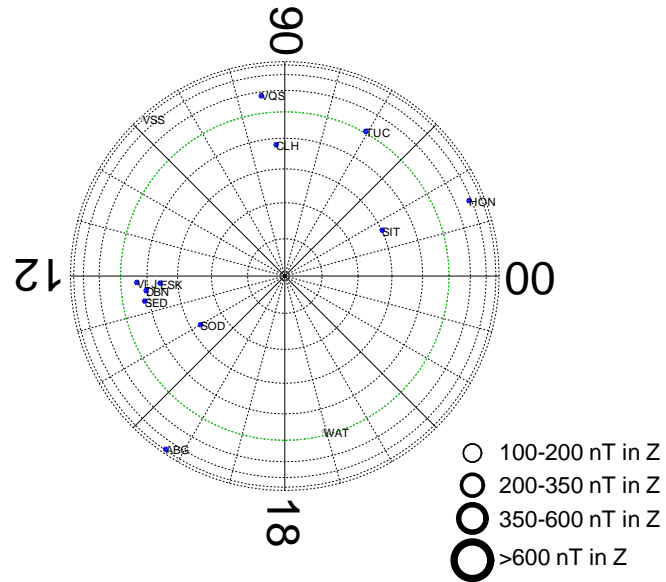

14 May 1921  
11:00 UT – 12:00 UT

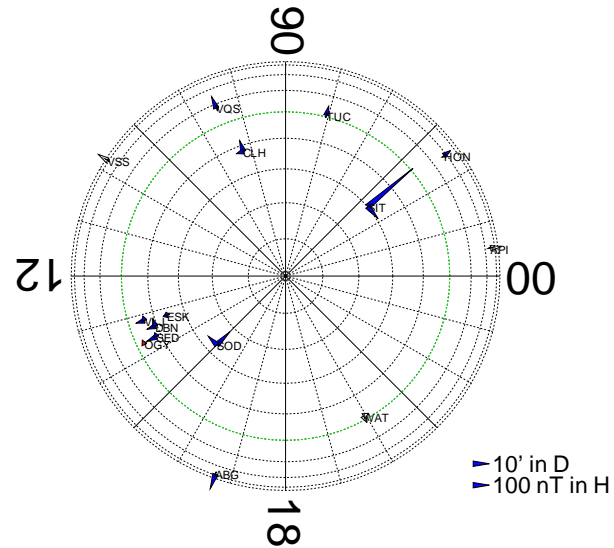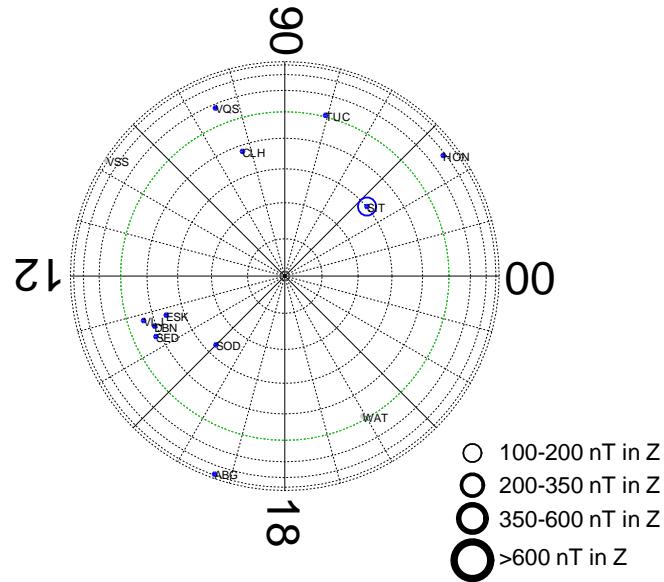

14 May 1921  
12:00 UT – 13:00 UT

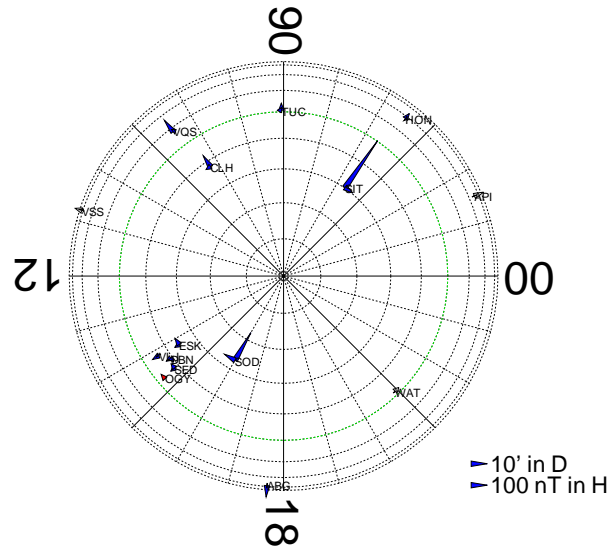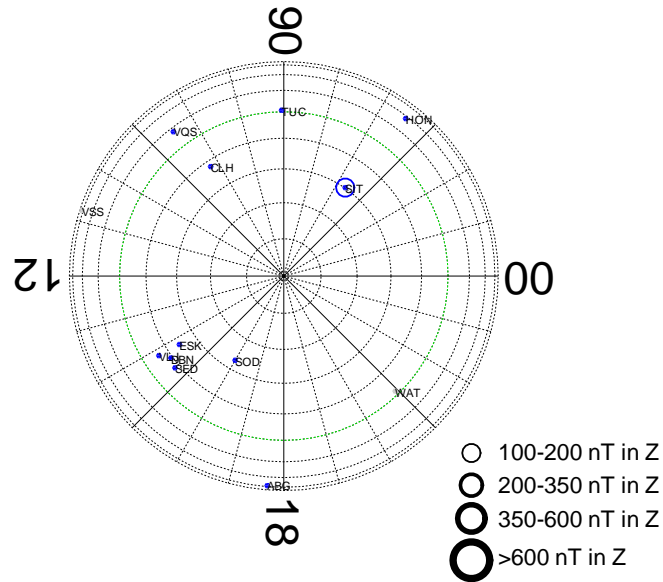

14 May 1921  
13:00 UT – 14:00 UT

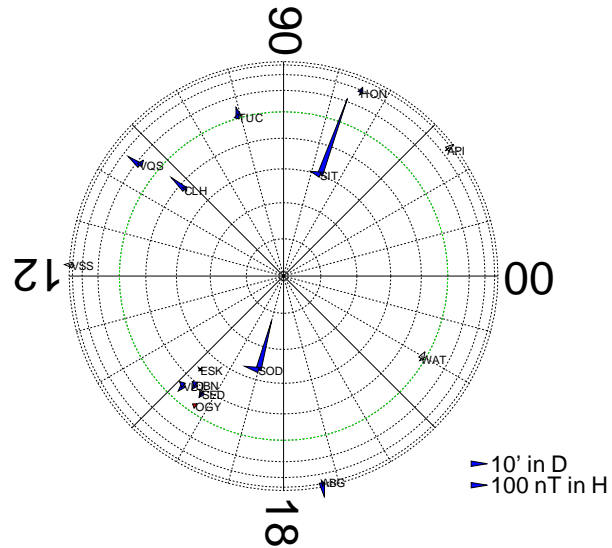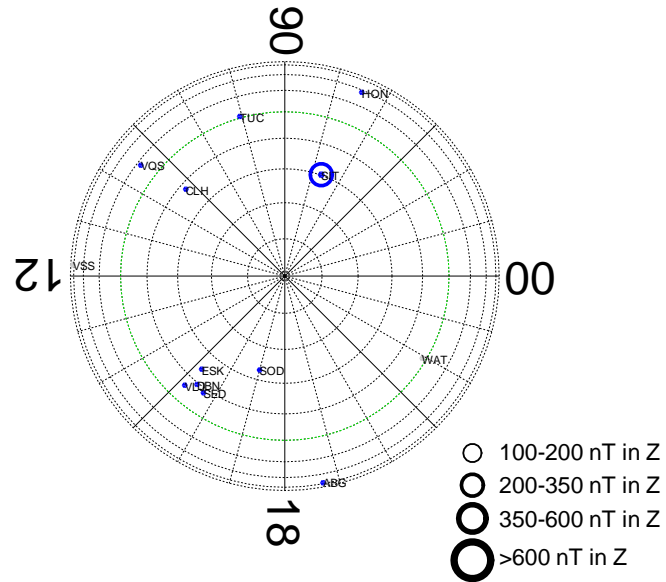

14 May 1921  
14:00 UT – 15:00 UT

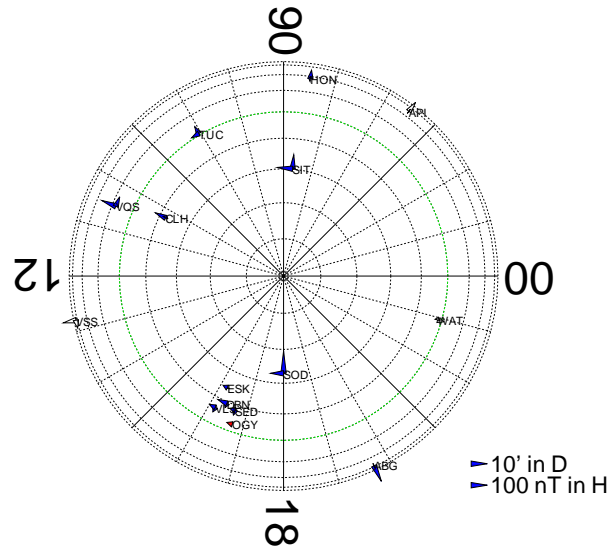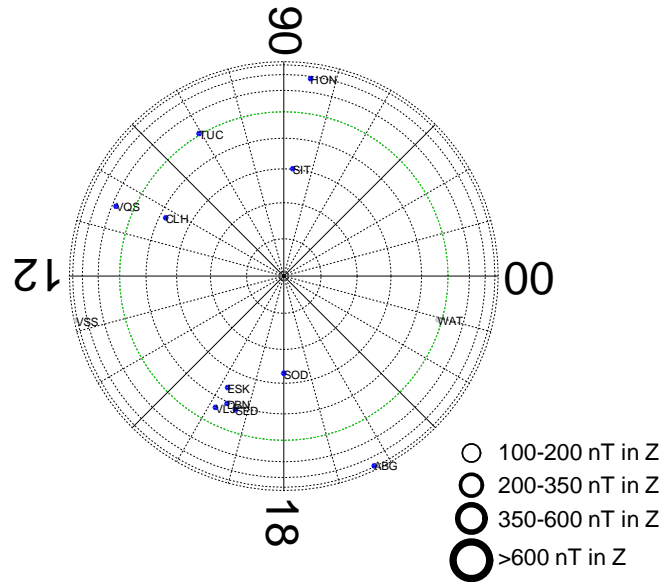

14 May 1921  
15:00 UT – 16:00 UT

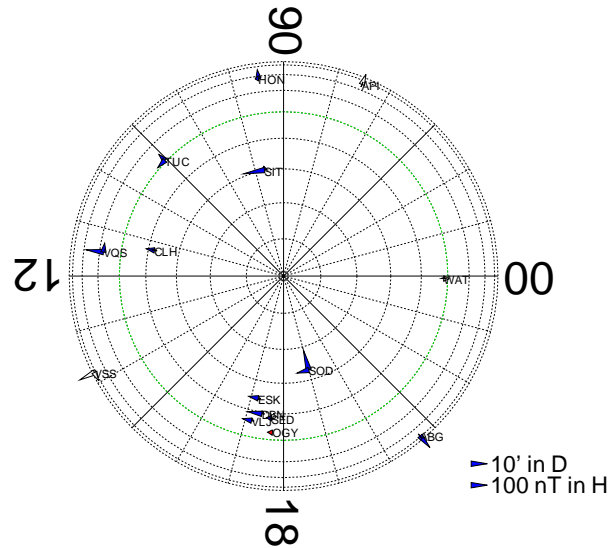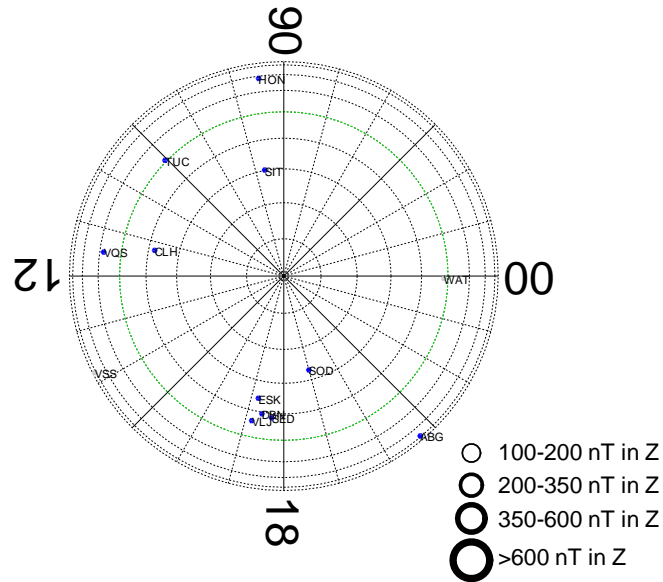



14 May 1921  
16:00 UT – 17:00 UT

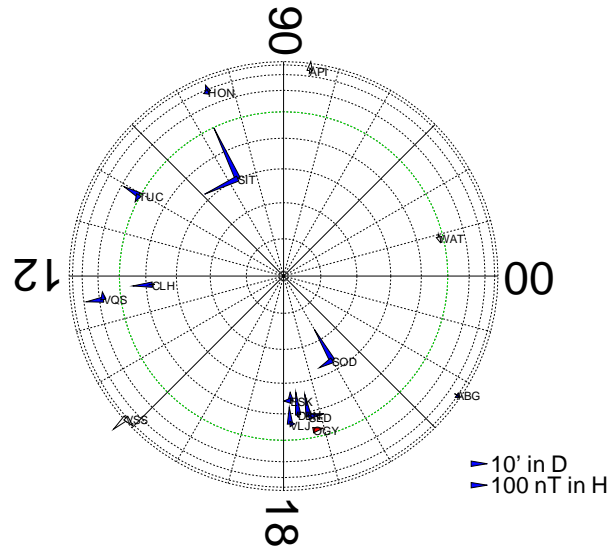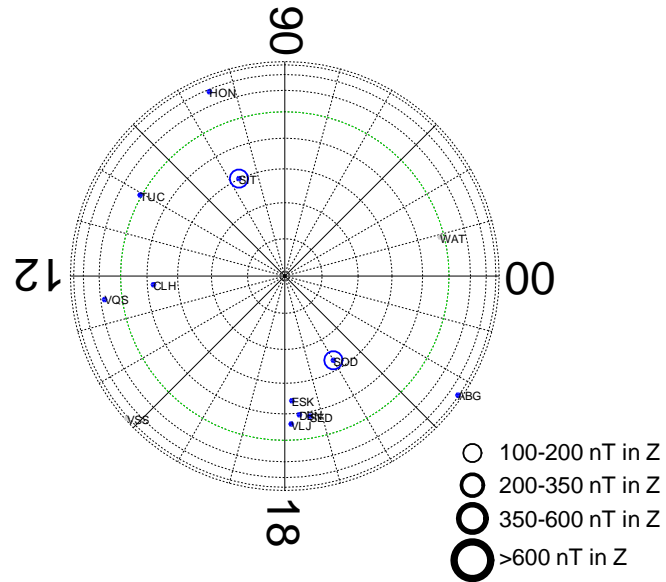

14 May 1921  
17:00 UT – 18:00 UT

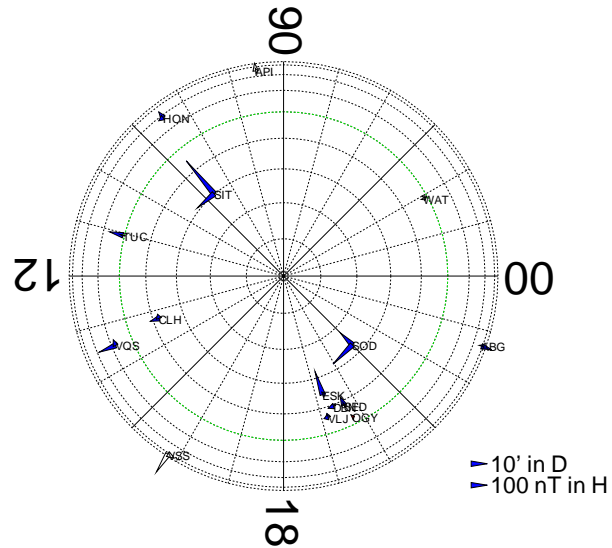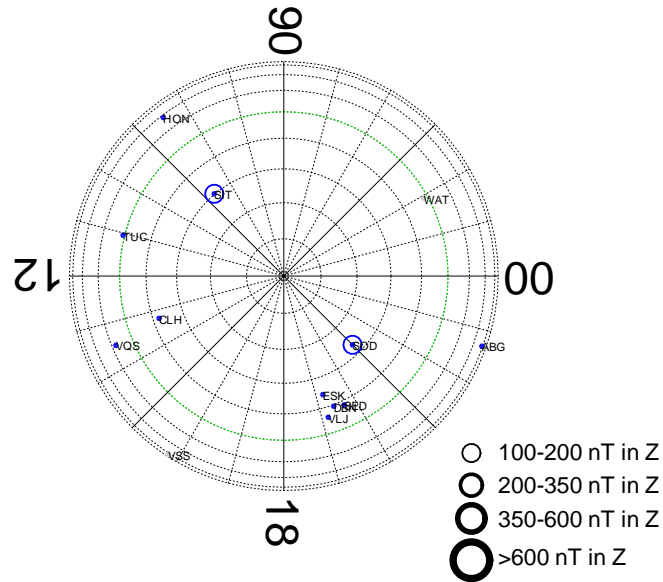

14 May 1921  
18:00 UT – 19:00 U

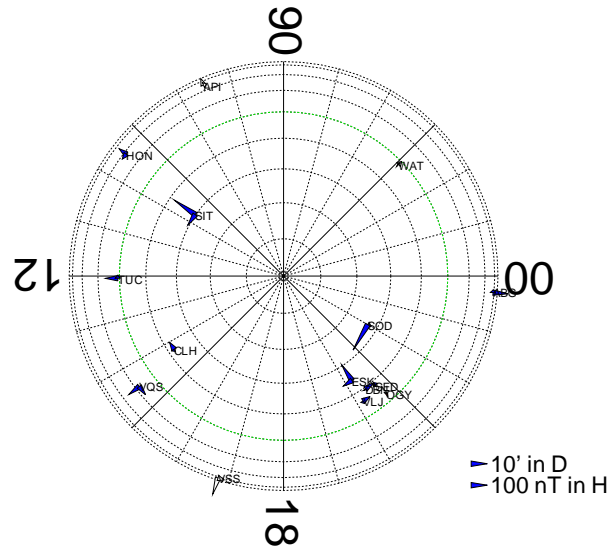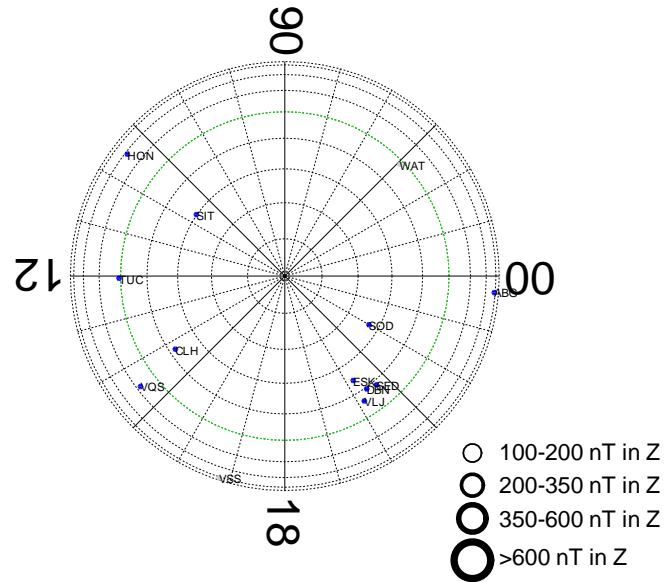

14 May 1921  
19:00 UT – 20:00 UT

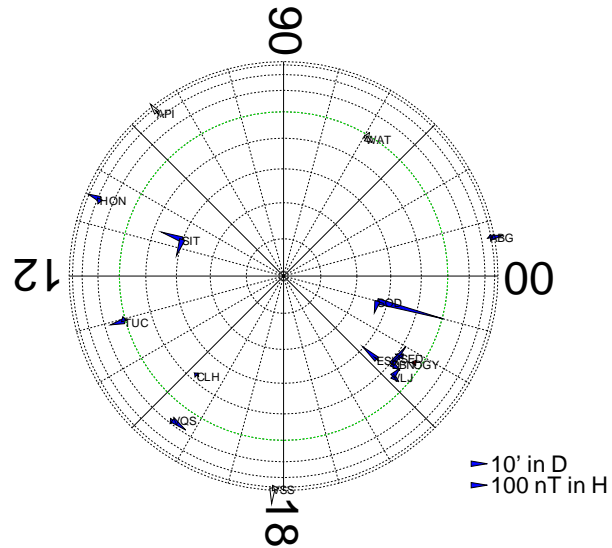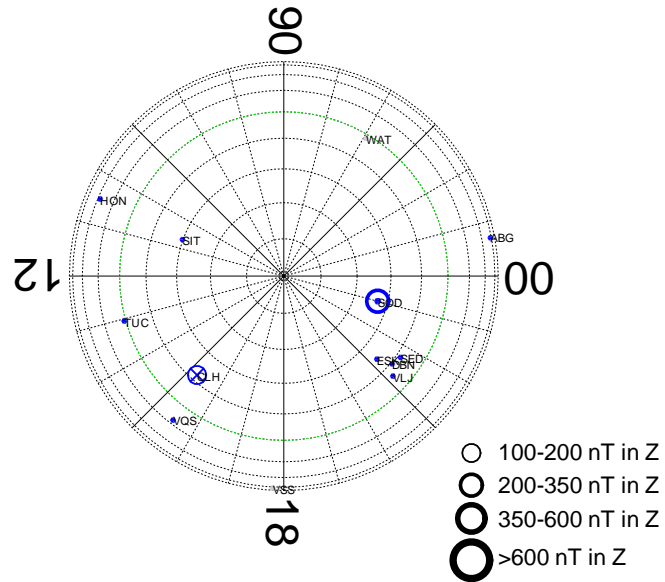

14 May 1921  
20:00 UT – 21:00 UT

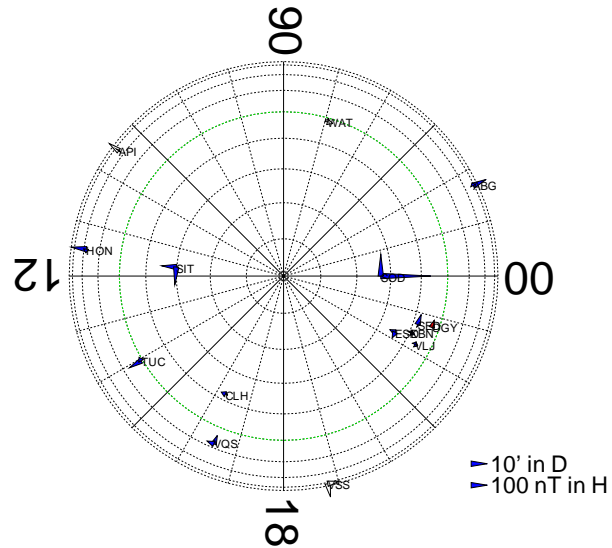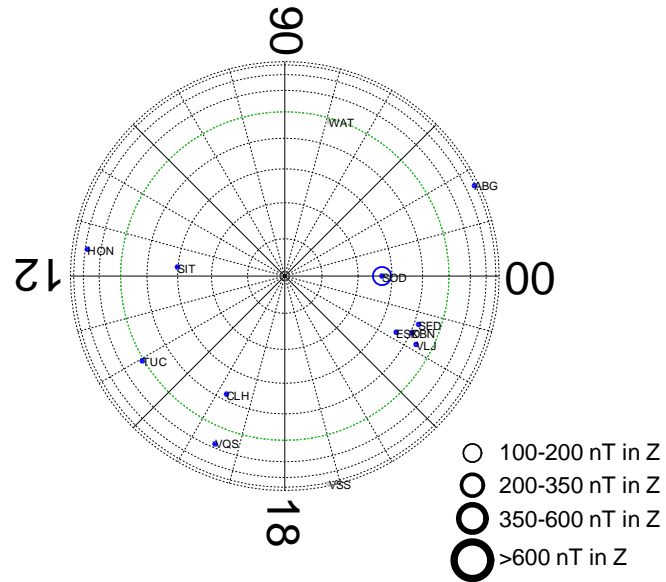

14 May 1921  
21:00 UT – 22:00 UT

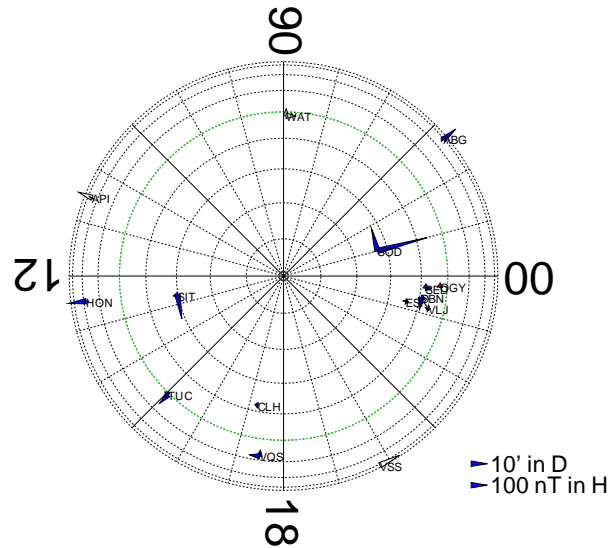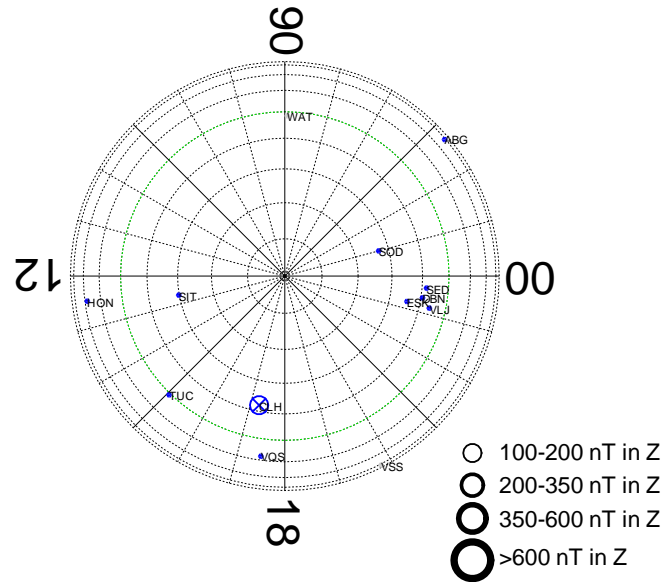

14 May 1921  
22:00 UT – 23:00 UT

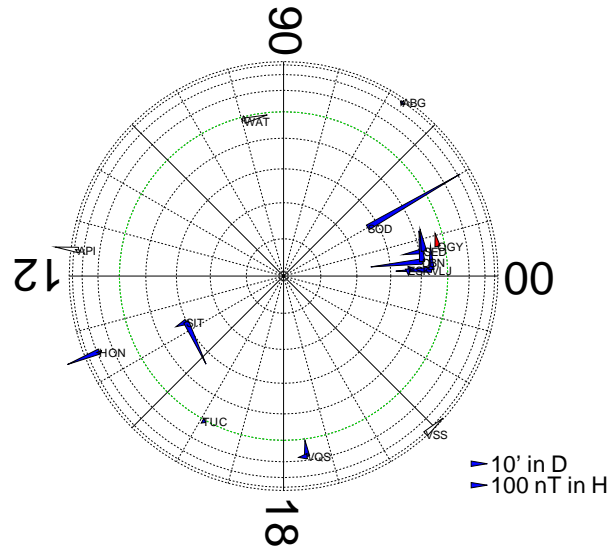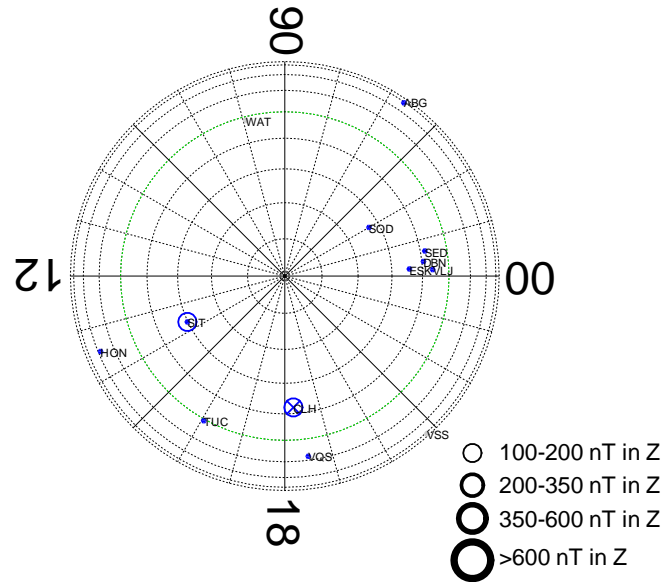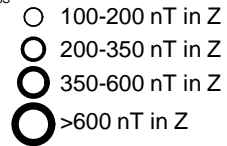

14 May 1921  
23:00 UT – Midnight

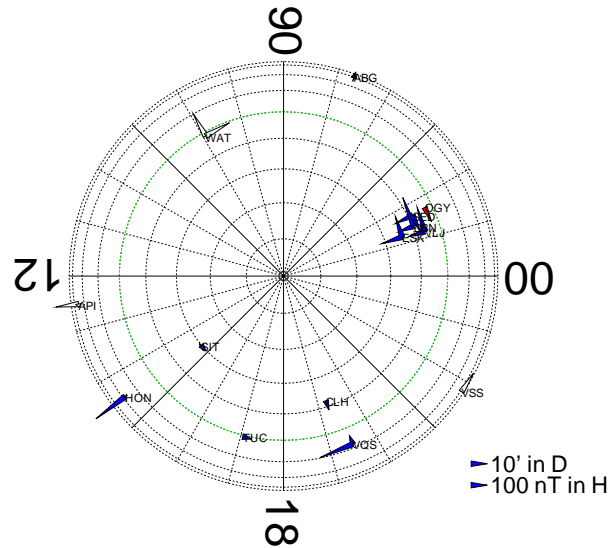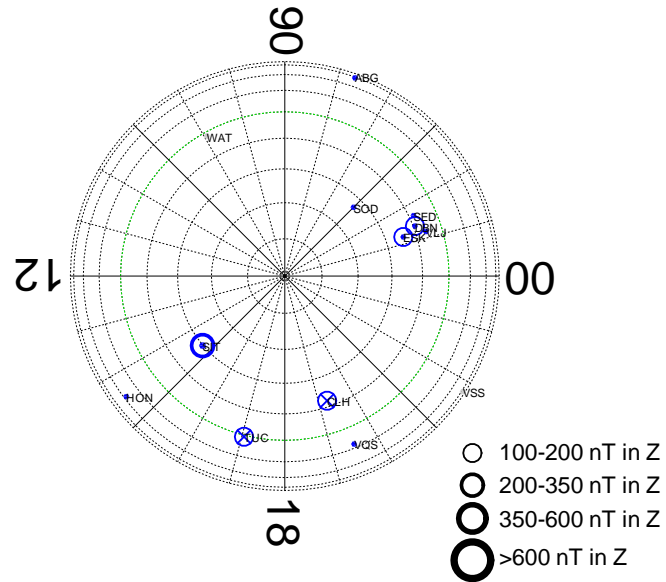



15 May 1921  
00:00 UT – 01:00 UT

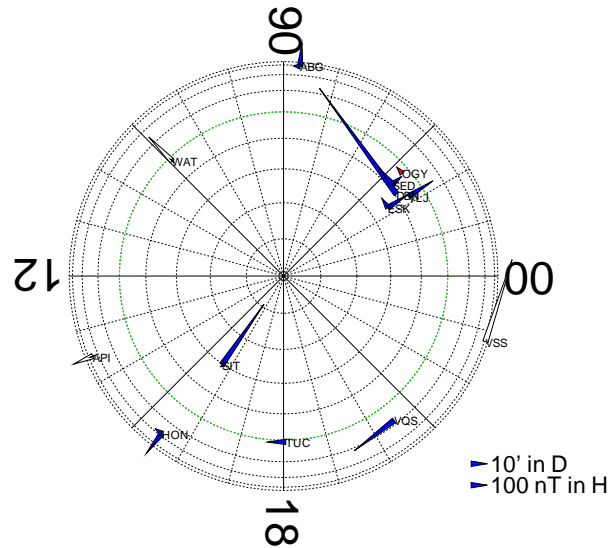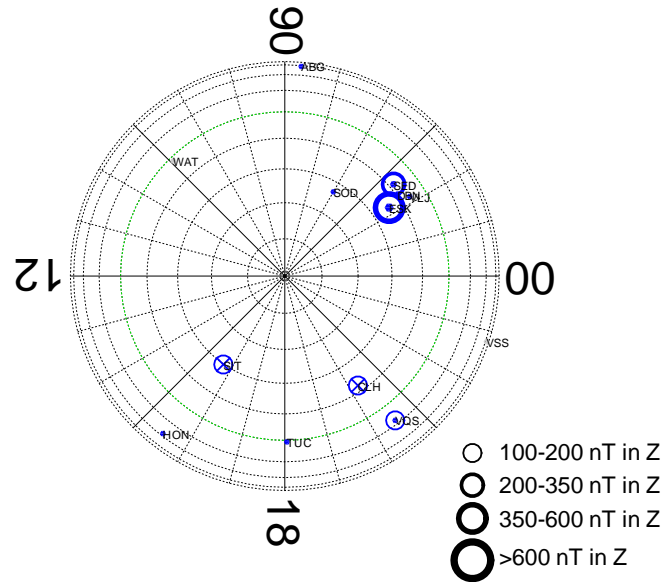

15 May 1921  
01:00 UT – 02:00 UT

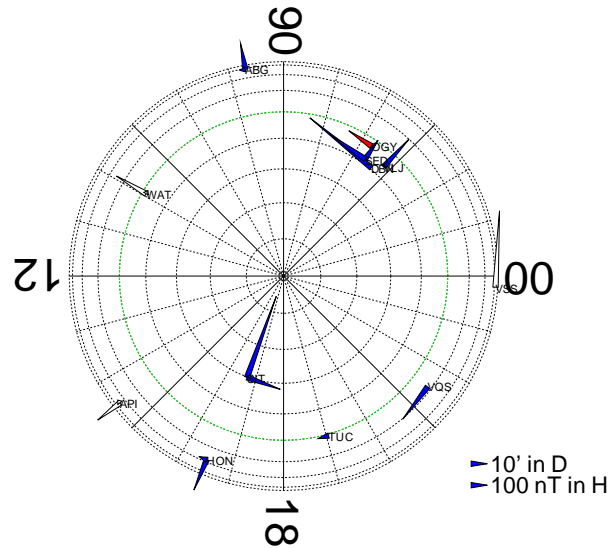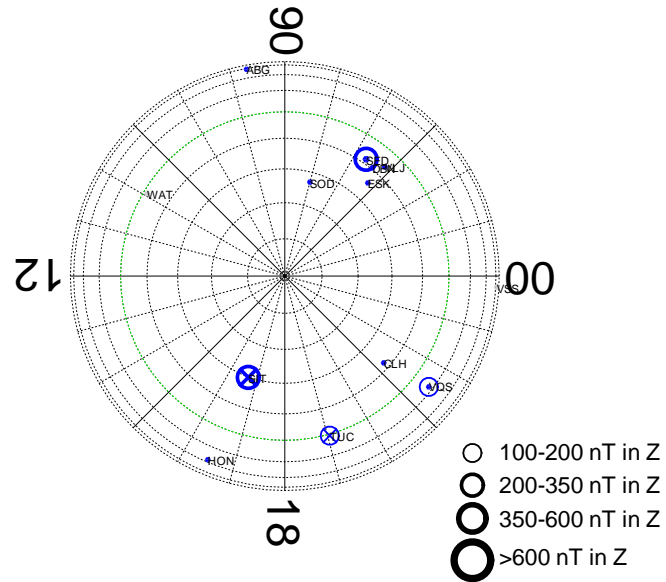

15 May 1921  
02:00 UT – 03:00 UT

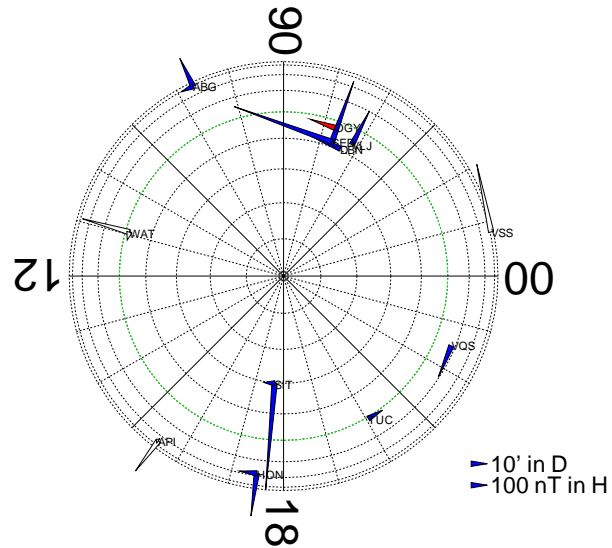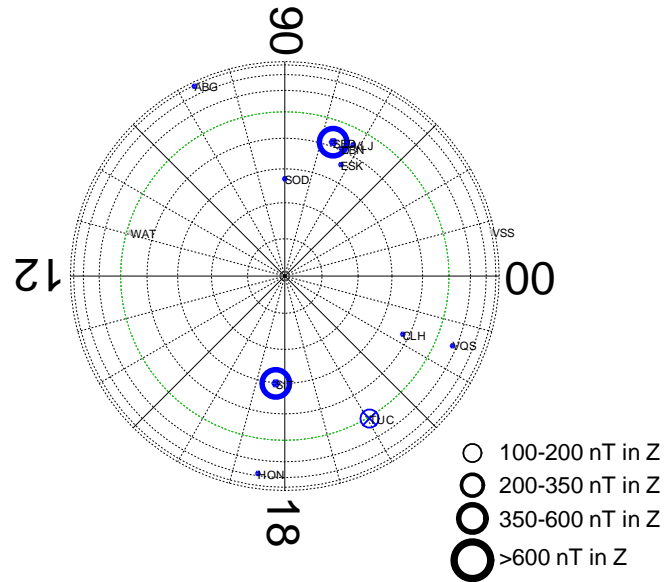

15 May 1921  
03:00 UT – 04:00 UT

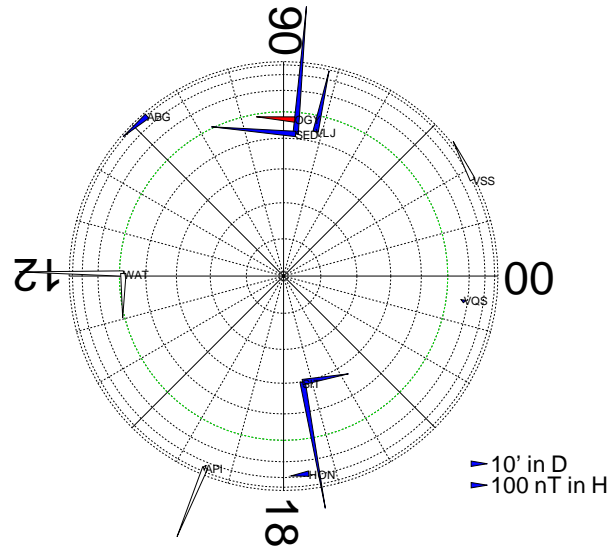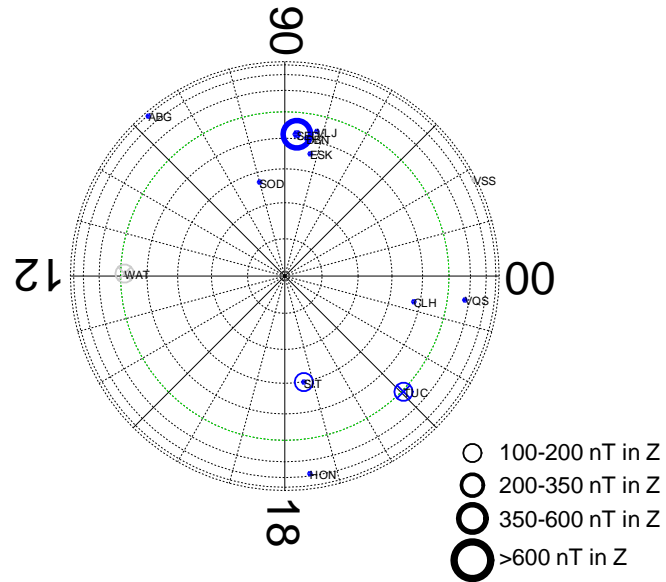

15 May 1921  
04:00 UT – 05:00 UT

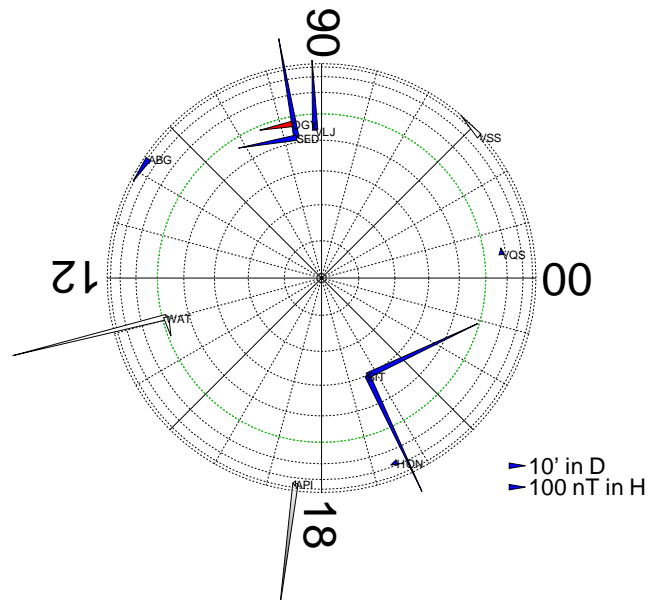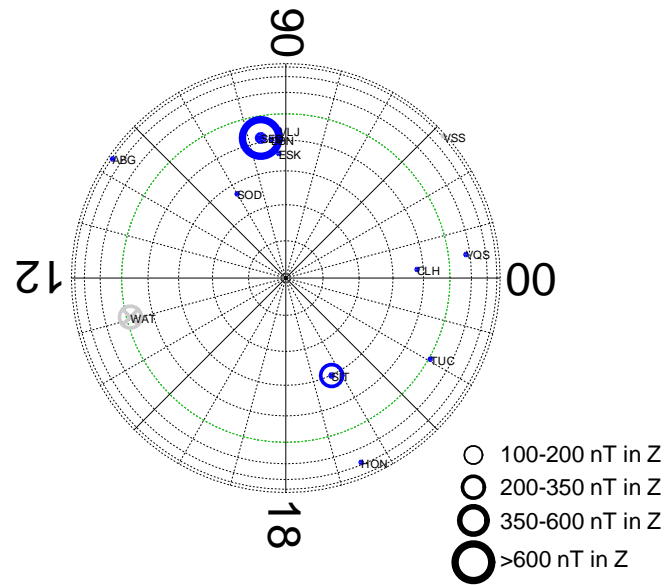

15 May 1921  
05:00 UT – 06:00 UT

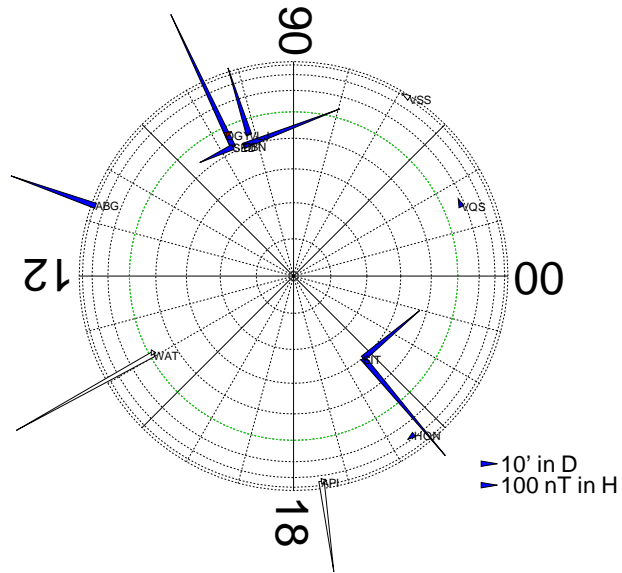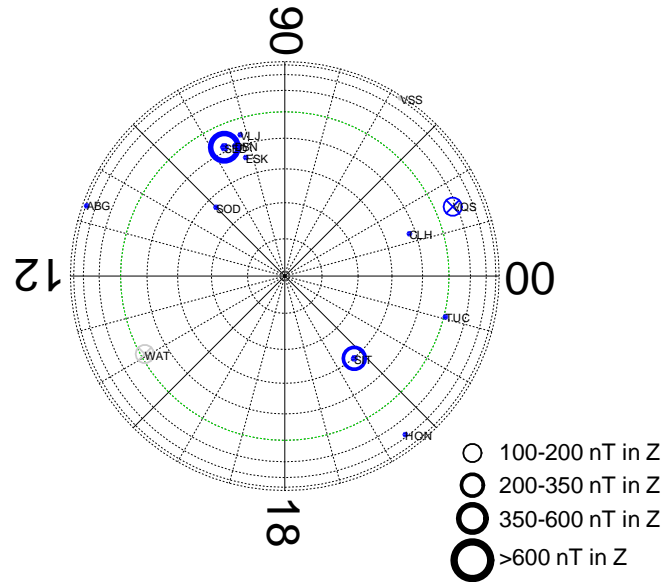

15 May 1921  
06:00 UT – 07:00 UT

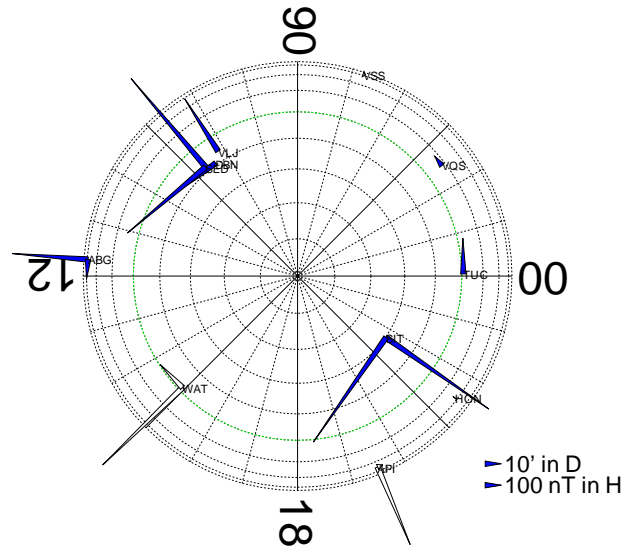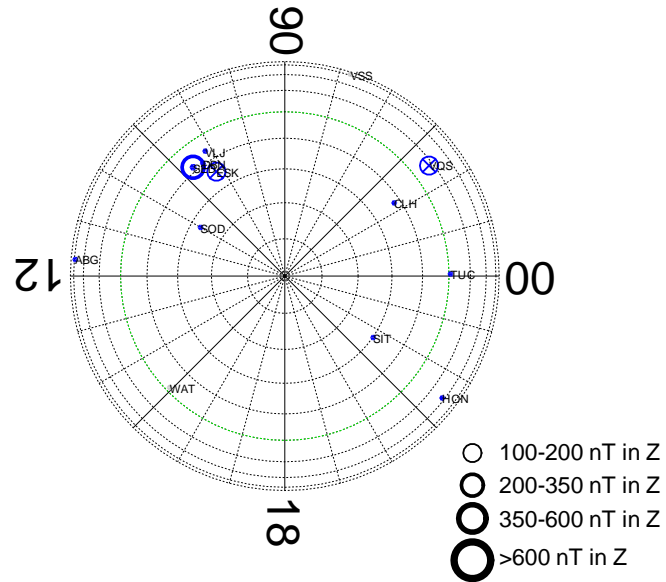

15 May 1921  
07:00 UT – 08:00 UT

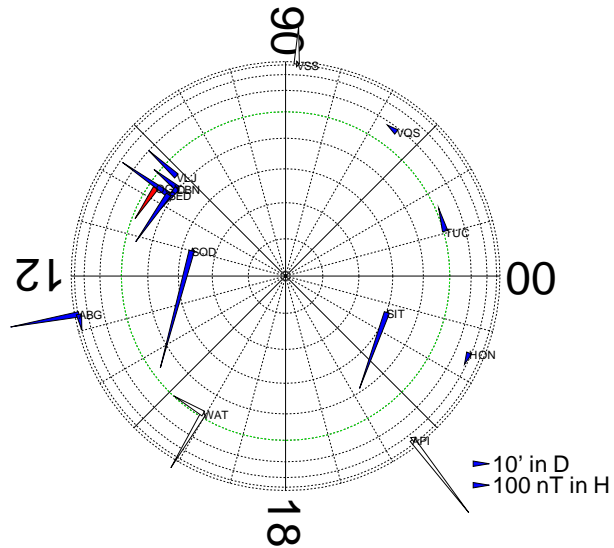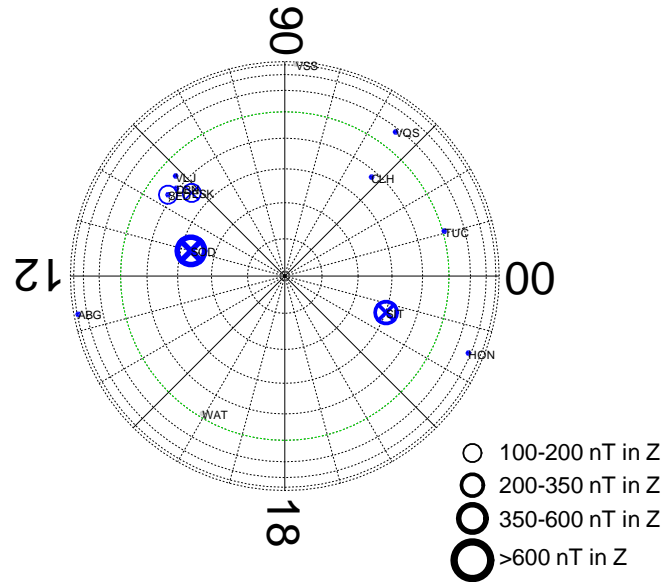



15 May 1921  
08:00 UT – 09:00 UT

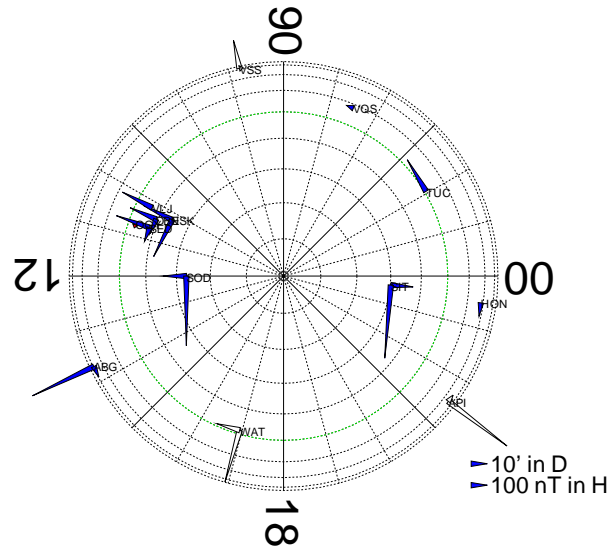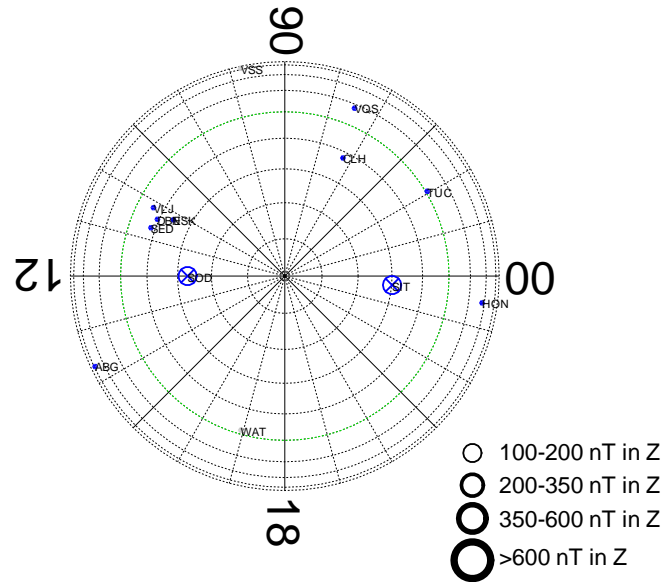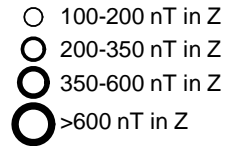

15 May 1921  
09:00 UT – 10:00 UT

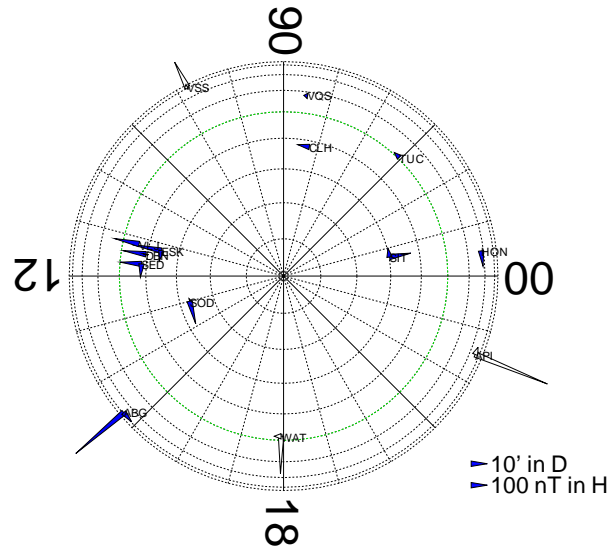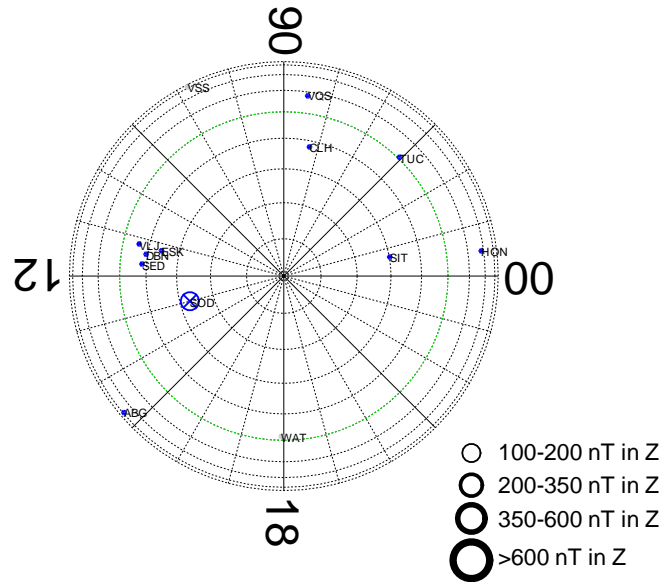

15 May 1921  
10:00 UT – 11:00 UT

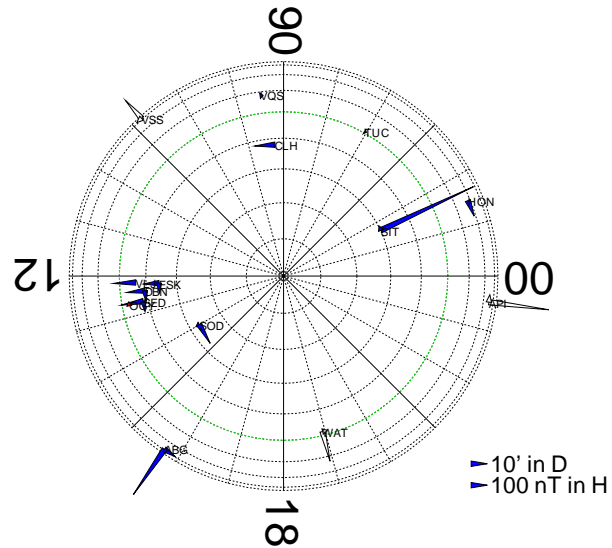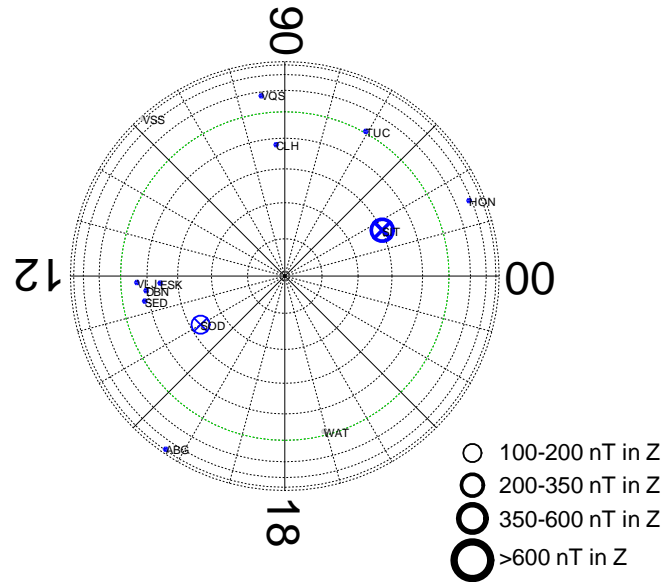

15 May 1921  
11:00 UT – 12:00 UT

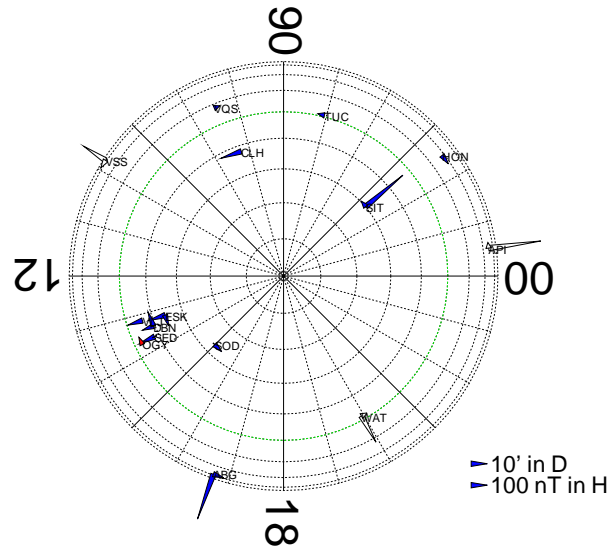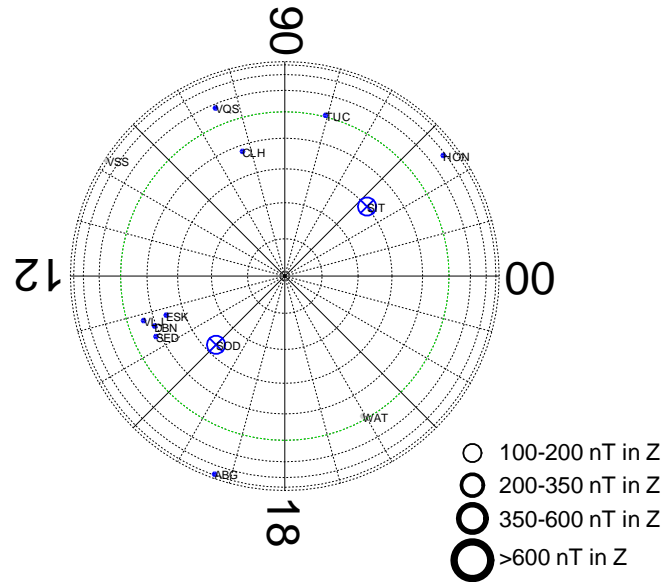

15 May 1921  
12:00 UT – 13:00 UT

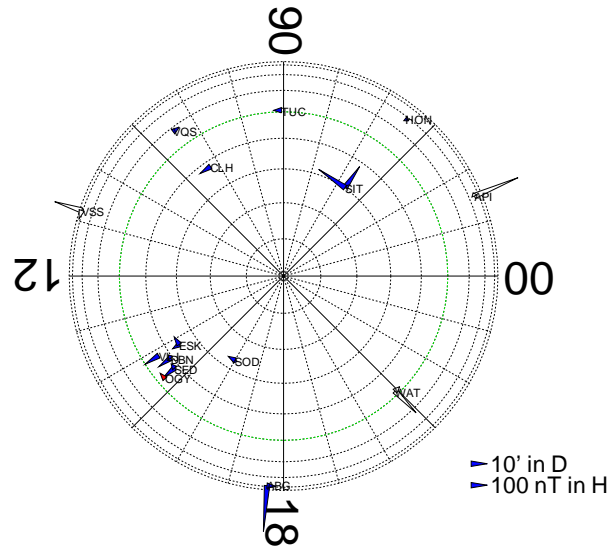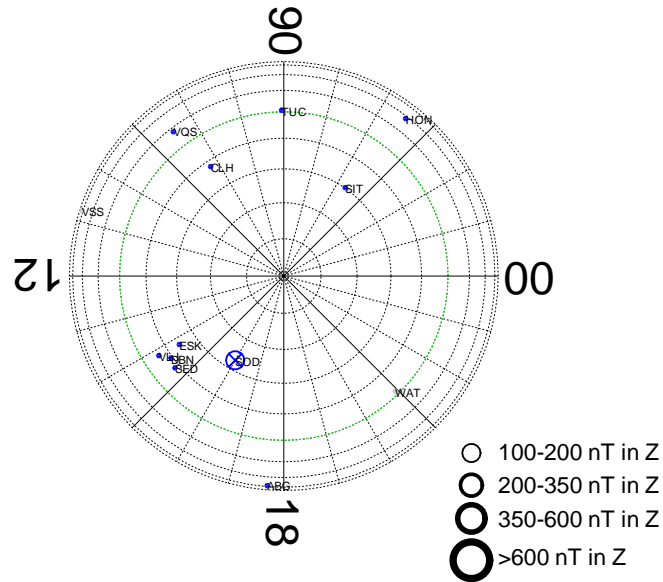

15 May 1921  
13:00 UT – 14:00 UT

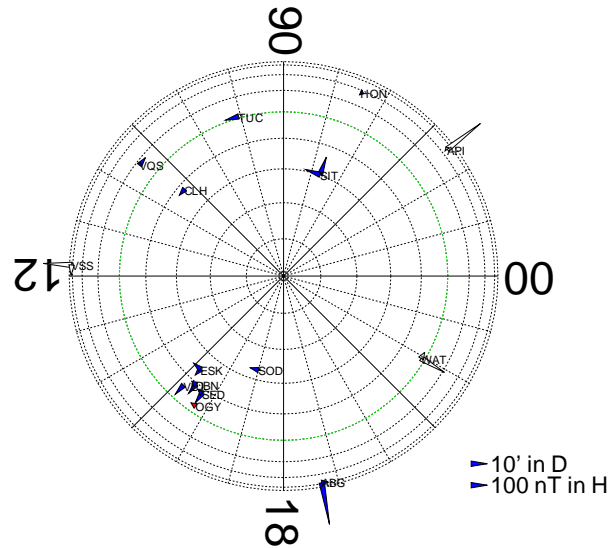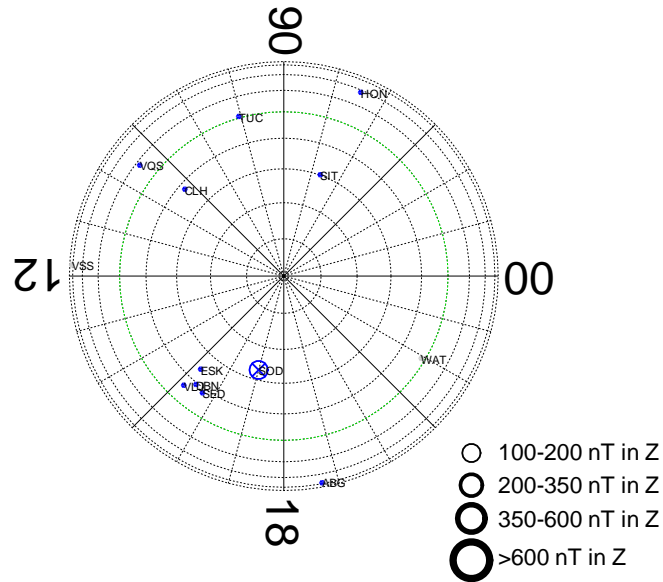

15 May 1921  
14:00 UT – 15:00 UT

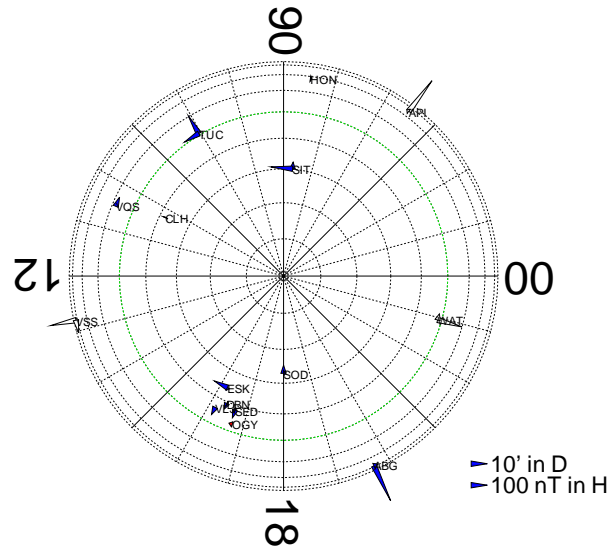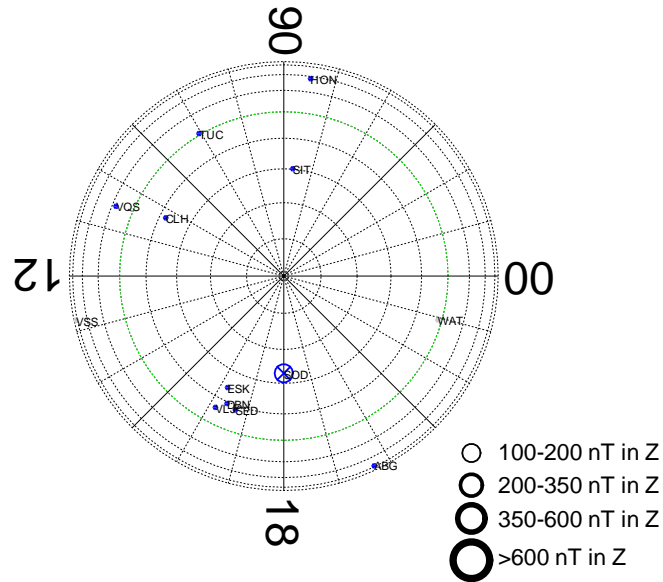

15 May 1921  
15:00 UT – 16:00 UT

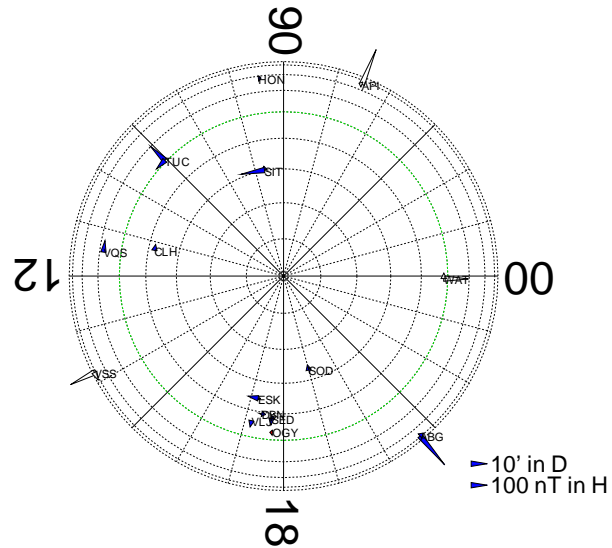



15 May 1921  
16:00 UT – 17:00 UT

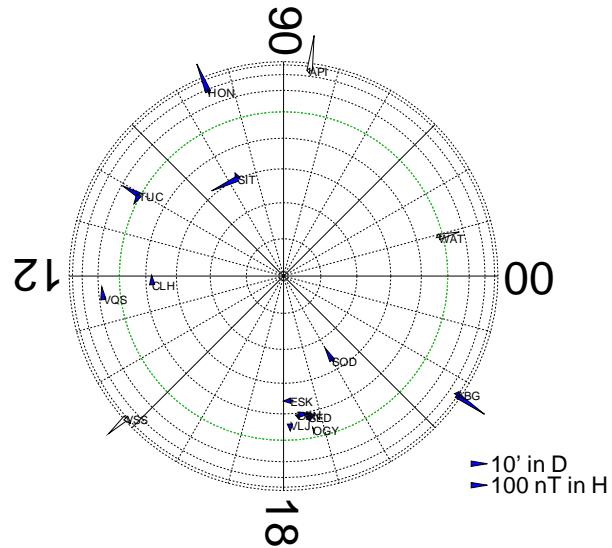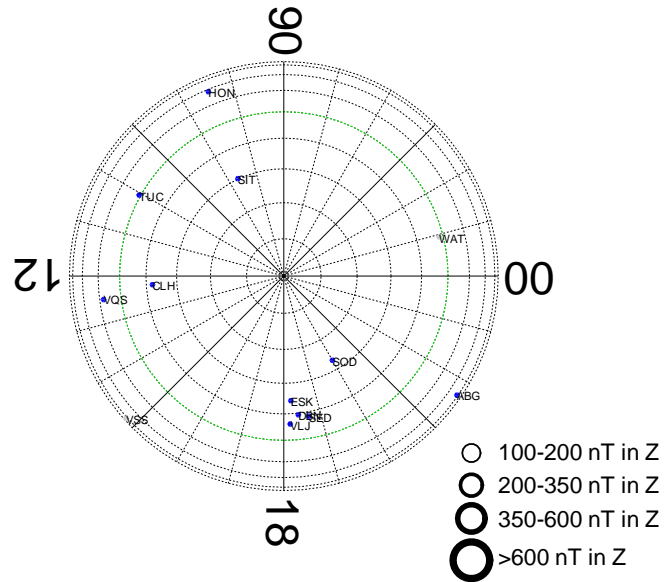

15 May 1921  
17:00 UT – 18:00 UT

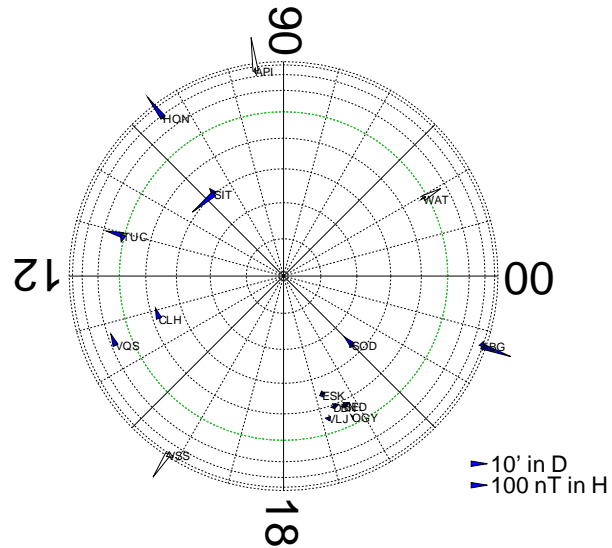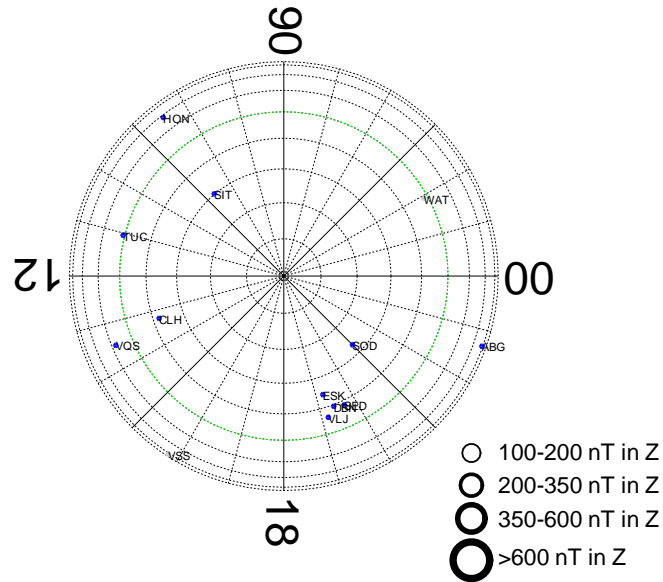

15 May 1921  
18:00 UT – 19:00 U

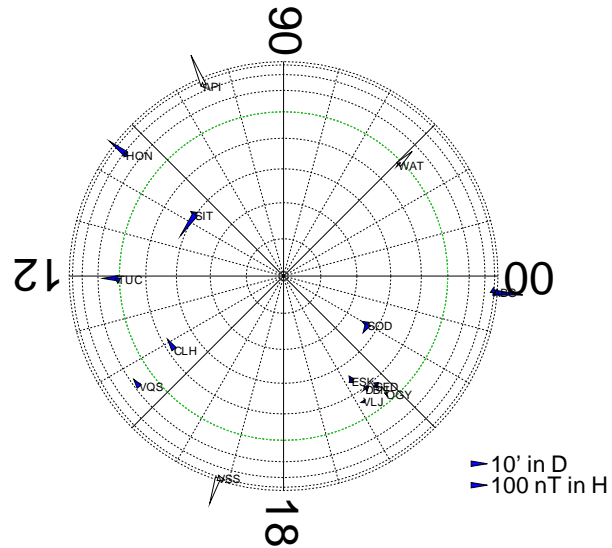

15 May 1921  
19:00 UT – 20:00 UT

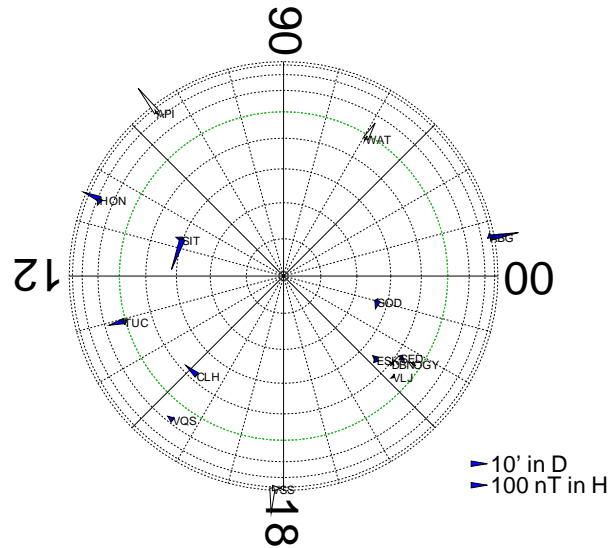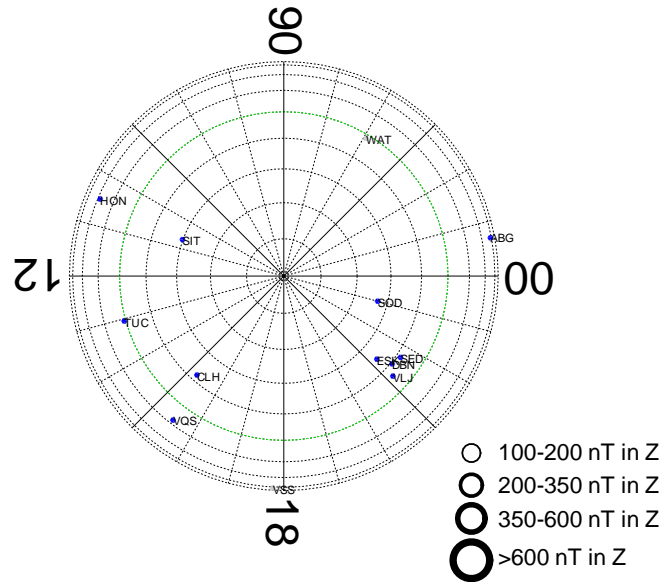

15 May 1921  
20:00 UT – 21:00 UT

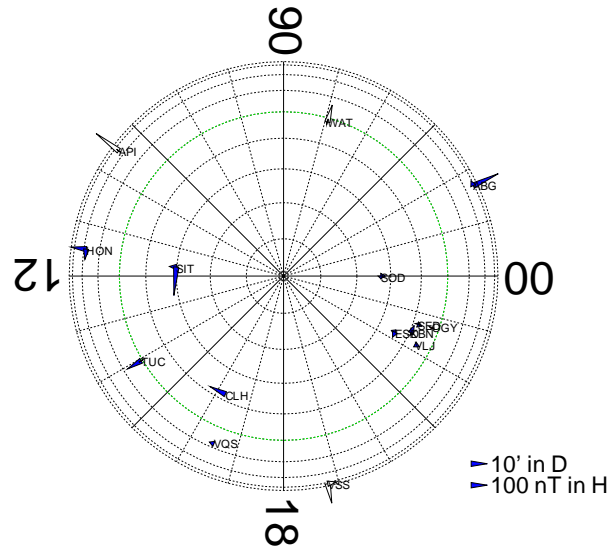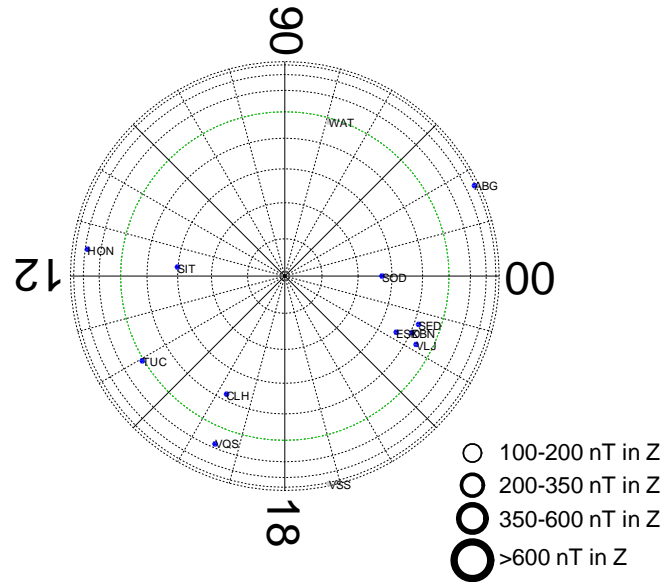

15 May 1921  
21:00 UT – 22:00 UT

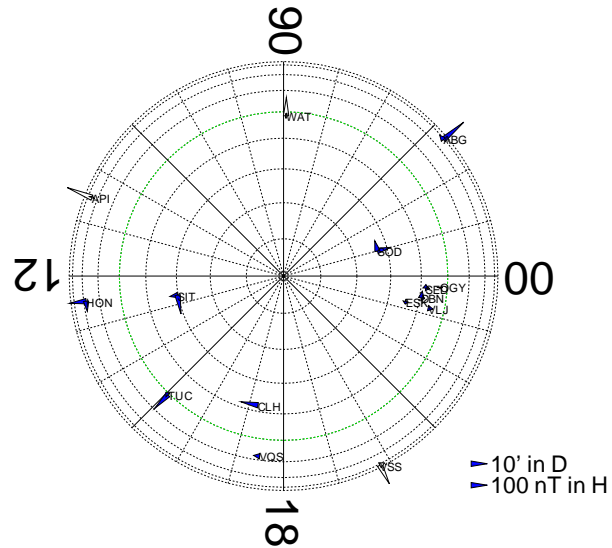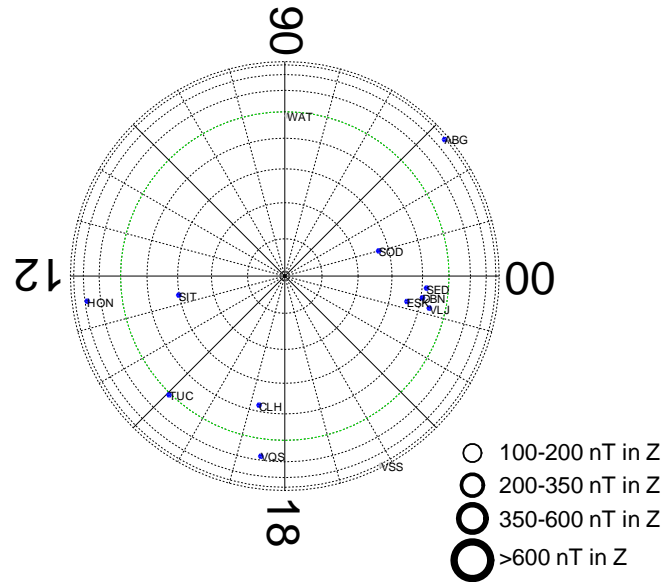

15 May 1921  
22:00 UT – 23:00 UT

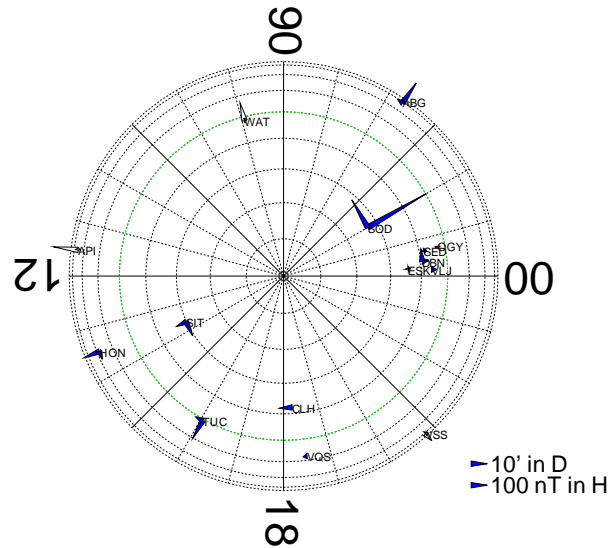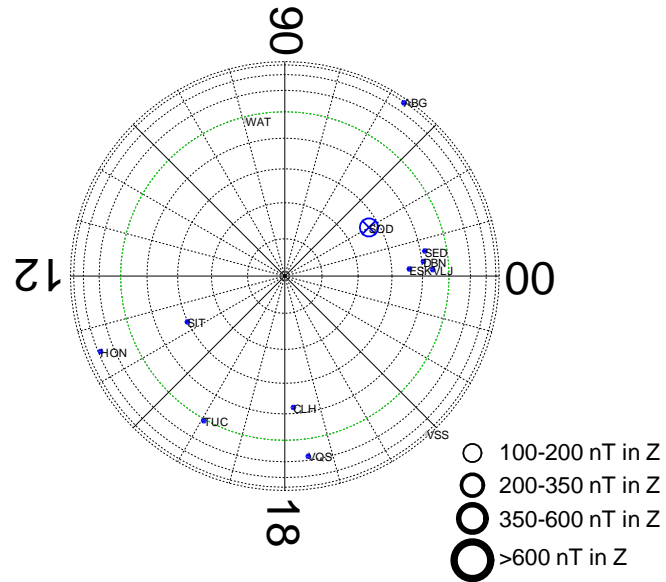

15 May 1921  
23:00 UT – Midnight

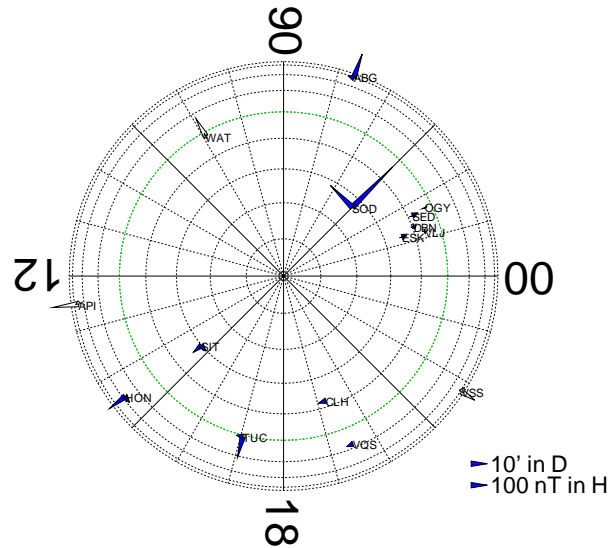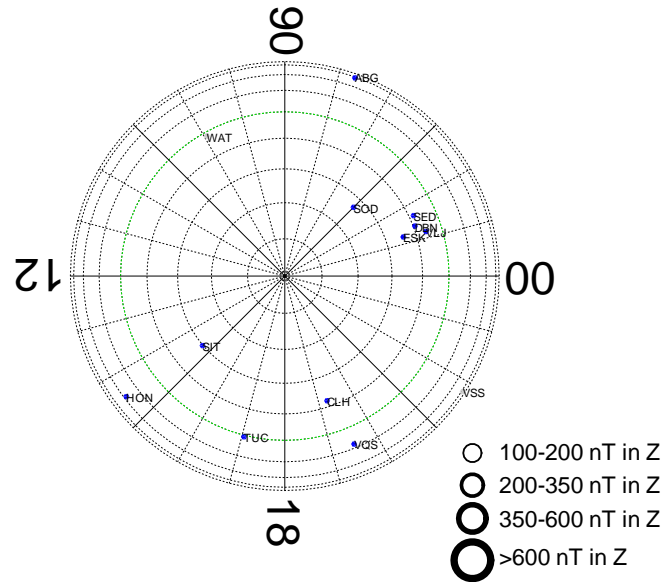

Supplement: Supplementary file 5 [file angeo-41-355-2023-supplement.zip]
