# Supplementary material for: The record of the magnetic storm on 15 May 1921 in Stará Ďala (present-day Hurbanovo) and its compliance with the global picture of this extreme event
Source: Copernicus journal article supplement (doi:10.5194/angeo-41-355-2023), 2023-09-12
Supplement: Supplementary file 3 [file angeo-41-355-2023-supplement.zip]

**Table S1** The names of the observatories whose data were used in the polar graphs (Fig. S2), their IAGA codes and geomagnetic quasi-dipole (QDP) coordinates for epoch 1921.4.

| Observatory name     | IAGA code | Quasi-dipole coordinates |           |
|----------------------|-----------|--------------------------|-----------|
|                      |           | Latitude                 | Longitude |
| Alibag               | ABG       | 11.44°N                  | 141.80°E  |
| Apia                 | API       | -15.13°N                 | 259.07°E  |
| Cheltenham           | CLH       | 51.90°N                  | 351.01°E  |
| De Bilt              | DBN       | 49.38°N                  | 85.37°E   |
| Eskdalemuir          | ESK       | 54.31°N                  | 80.28°E   |
| Honolulu             | HON       | 21.50°N                  | 266.68°E  |
| Seddin               | SED       | 48.43°N                  | 91.45°E   |
| Sitka                | SIT       | 59.72°N                  | 274.70°E  |
| Sodankyla            | SOD       | 62.79°N                  | 109.29°E  |
| Stará Ďala (ÓGyalla) | OGY       | 42.99°N                  | 94.09°E   |
| Tucson               | TUC       | 39.30°N                  | 310.53°E  |
| Val Joyeux           | VLJ       | 46.34°N                  | 81.72°E   |
| Vieques              | VQS       | 32.07°N                  | 3.74°E    |
| Vassouras            | VSS       | -8.17°N                  | 21.88°E   |
| Watheroo             | WAT       | -41.56°N                 | 183.68°E  |
