# Supplementary material for: The record of the magnetic storm on 15 May 1921 in Stará Ďala (present-day Hurbanovo) and its compliance with the global picture of this extreme event
Source: Copernicus journal article supplement (doi:10.5194/angeo-41-355-2023), 2023-09-12
Supplement: Supplementary file 4 [file angeo-41-355-2023-supplement.zip]

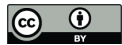

## *Supplement of*

# **The record of the magnetic storm on 15 May 1921 in Stará Ďala (present-day Hurbanovo) and its compliance with the global picture of this extreme event**

**Eduard Koči and Fridrich Valach**

*Correspondence to:* Fridrich Valach ([geoffval@savba.sk](mailto:geoffval@savba.sk))

- [angeo-41-355-2023-supplement-title-page.pdf](#)
- Supplement
  - [Declination\\_Stara\\_Dala\\_5min.dat](#)
  - [Declination\\_Stara\\_Dala\\_momentary.dat](#)
  - [FigureS1.pdf](#)
  - [FigureS2.pdf](#)
  - [ReadMe.pdf](#)
  - [TableS1.pdf](#)
  - [Vertical\\_intensity\\_Stara\\_Dala\\_5min.dat](#)
  - [Vertical\\_intensity\\_Stara\\_Dala\\_momentary.dat](#)

The copyright of individual parts of the supplement might differ from the article licence.
