# Supplementary figures and images for: The record of the magnetic storm on 15 May 1921 in Stará Ďala (present-day Hurbanovo) and its compliance with the global picture of this extreme event
Source: Copernicus journal article supplement (doi:10.5194/angeo-41-355-2023), 2023-09-12

1921. V. 12

1921. V. 13

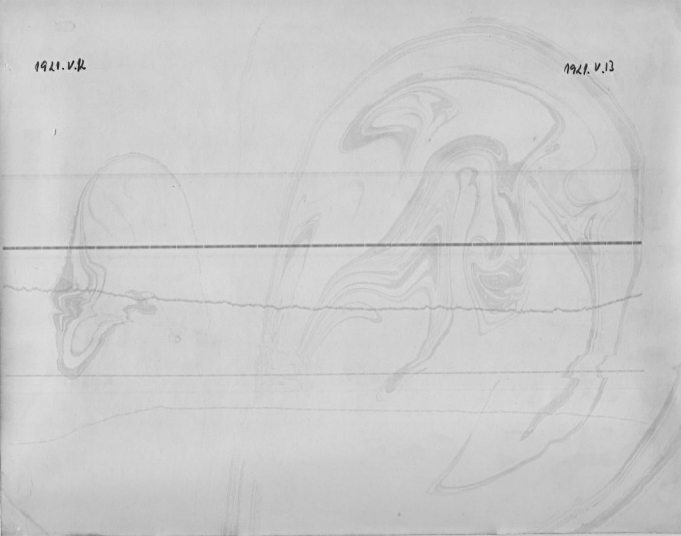

1921.V.13

1921.V.14

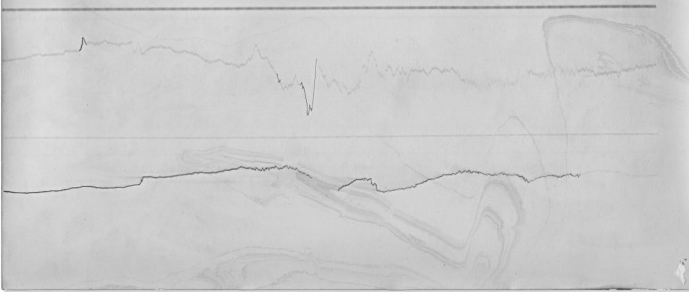

1921.V.14

1921.V.15

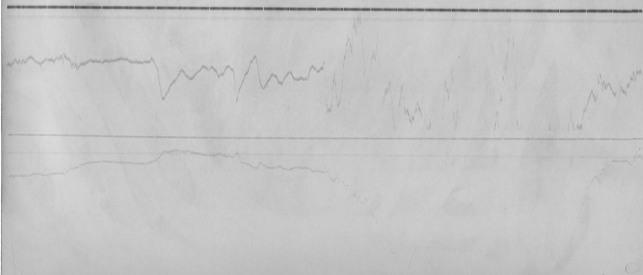

Supplement: Supplementary file 2 [file angeo-41-355-2023-supplement.zip]
